# Supplementary material for: Fluorescent α-amino acids via Heck–Matsuda reactions of phenylalanine-derived arenediazonium salts
Source: Royal Society of Chemistry journal article supplement (doi:10.1039/d3ob01096a), 2023-01-01

**Supporting Information for:**

**Fluorescent  $\alpha$ -Amino Acids via Heck-Matsuda Reactions of  
Phenylalanine-Derived Arenediazonium Salts**

*Rochelle McGrory, Rebecca Clarke, Olivia Marshall and Andrew Sutherland\**

School of Chemistry, The Joseph Black Building, University of Glasgow,

Glasgow G12 8QQ, United Kingdom.

**Table of Contents**

|                                                                            |        |
|----------------------------------------------------------------------------|--------|
| 1. Photophysical Data for $\alpha$ -Amino Acids <b>12c–f</b> and <b>14</b> | S2–S6  |
| 2. $^1\text{H}$ and $^{13}\text{C}$ NMR Spectra for all Compounds          | S7–S28 |

## 1. Photophysical Data for $\alpha$ -Amino Acids 12c–f and 14

Spectra were recorded using an excitation and emission slit width of 5 nm.

### Absorption and Emission Spectra for 12c (5 $\mu$ M in methanol).

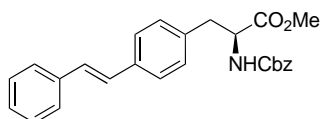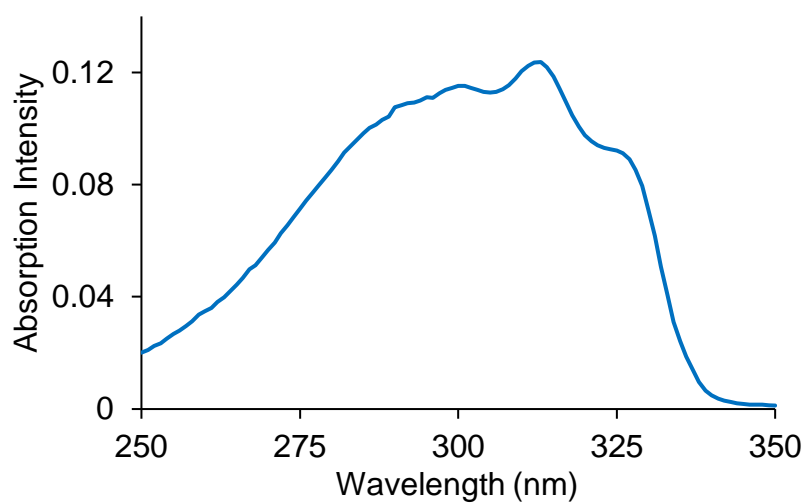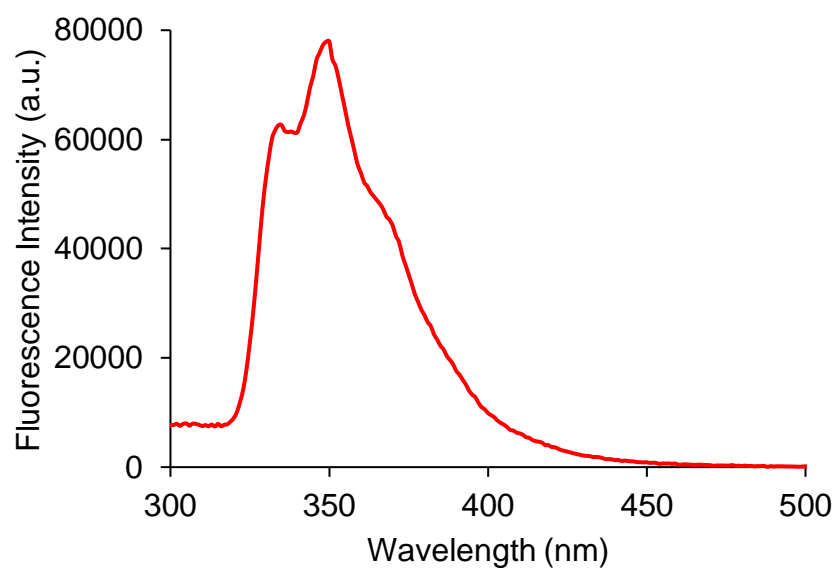

**Absorption and Emission Spectra for 12d (2  $\mu$ M in methanol).**

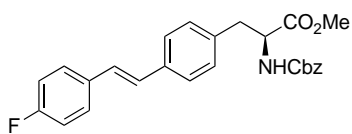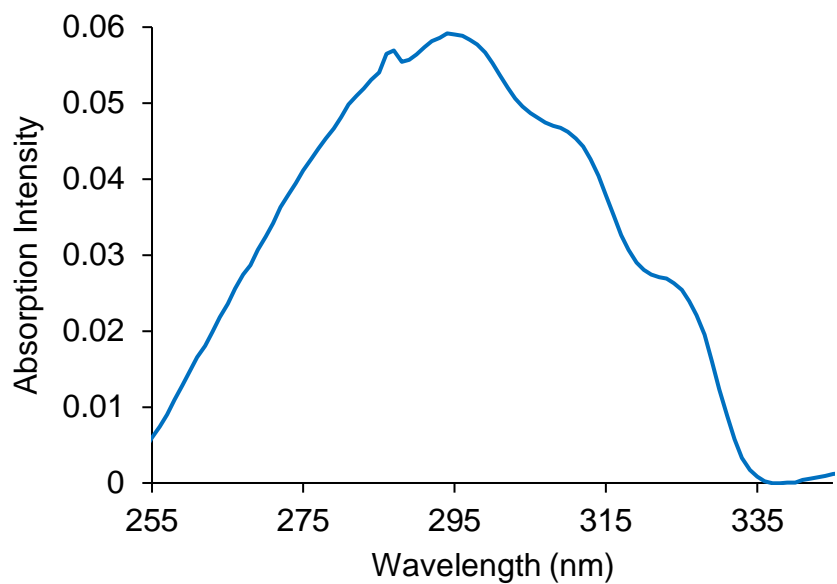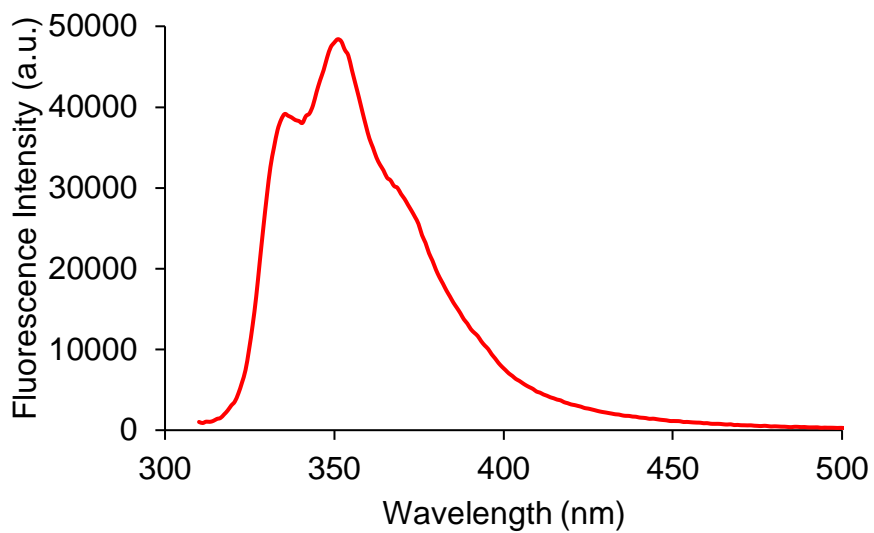

**Absorption and Emission Spectra for 12e (2  $\mu\text{M}$  in methanol).**

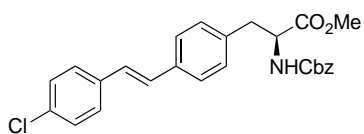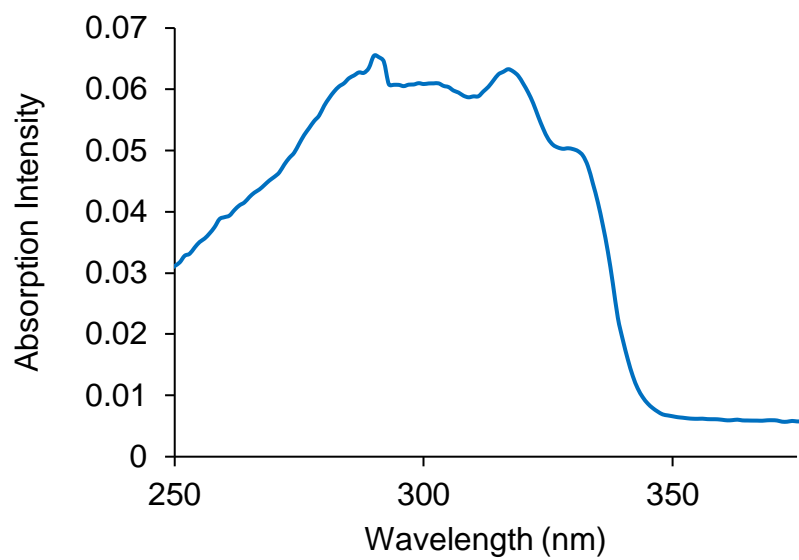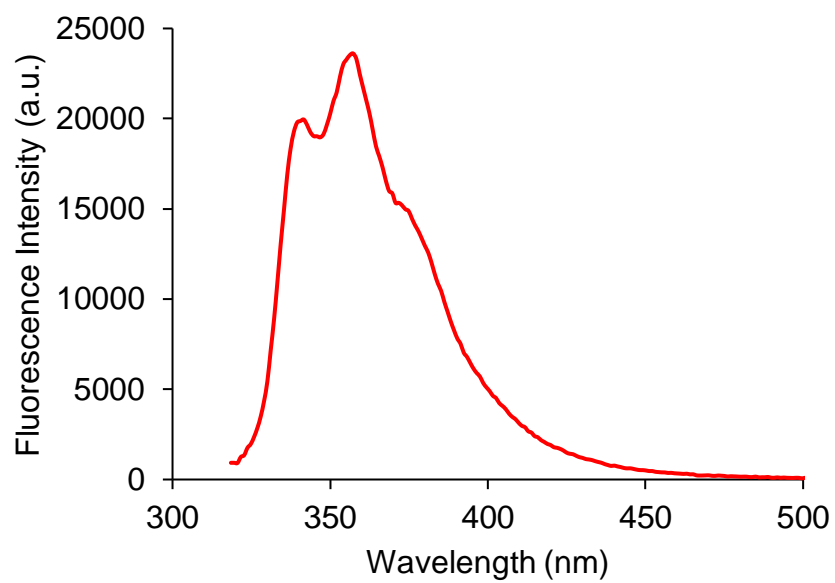

**Absorption and Emission Spectra for 12f (5  $\mu$ M in methanol).**

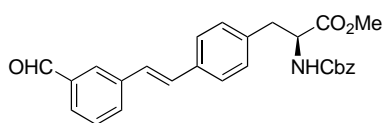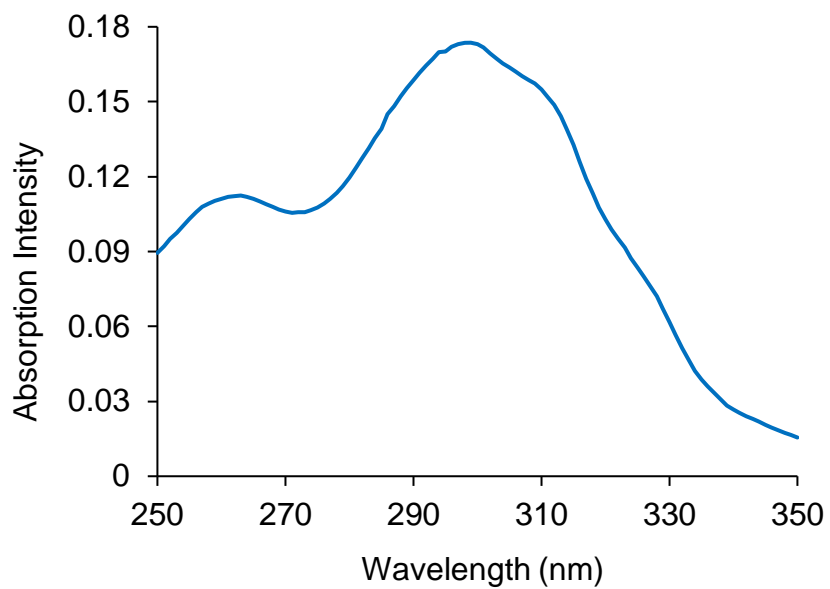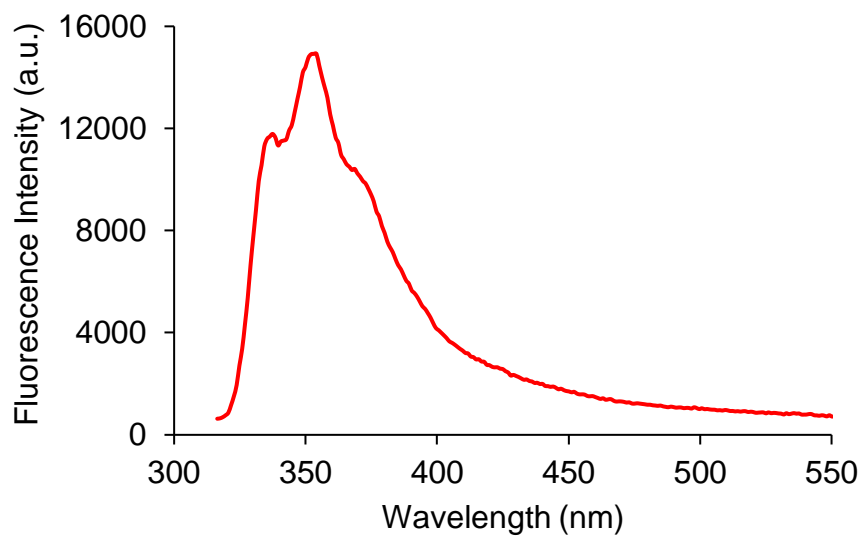

**Absorption and Emission Spectra for 14 (5  $\mu\text{M}$  in methanol).**

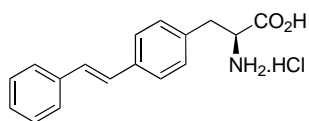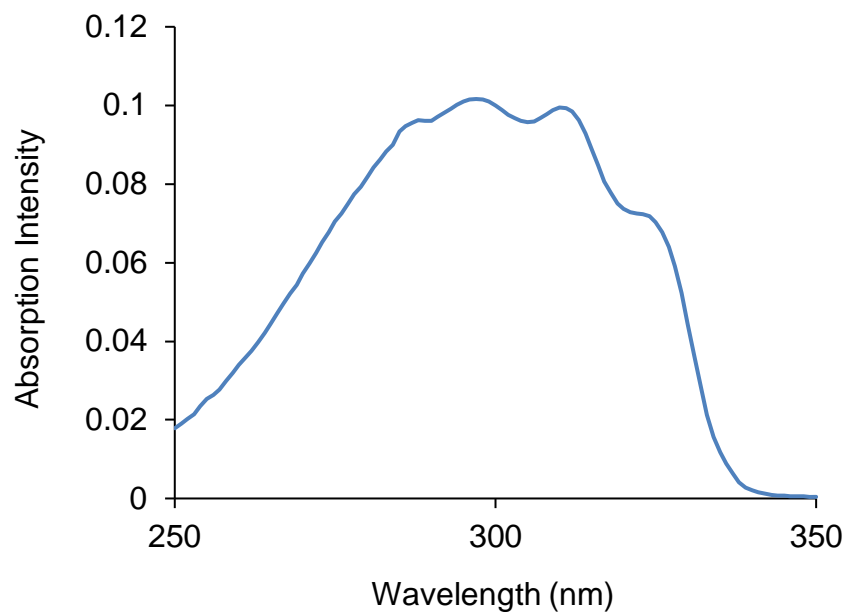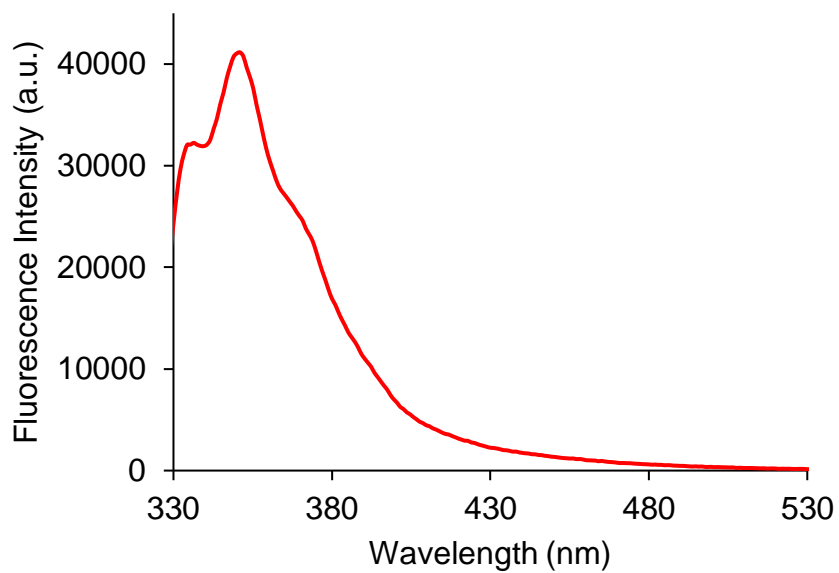

## 2. <sup>1</sup>H and <sup>13</sup>C NMR Spectra for all Compounds

<sup>1</sup>H NMR (400 MHz, DMSO-*d*<sub>6</sub>)

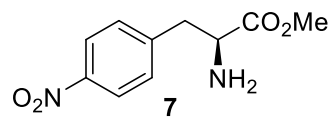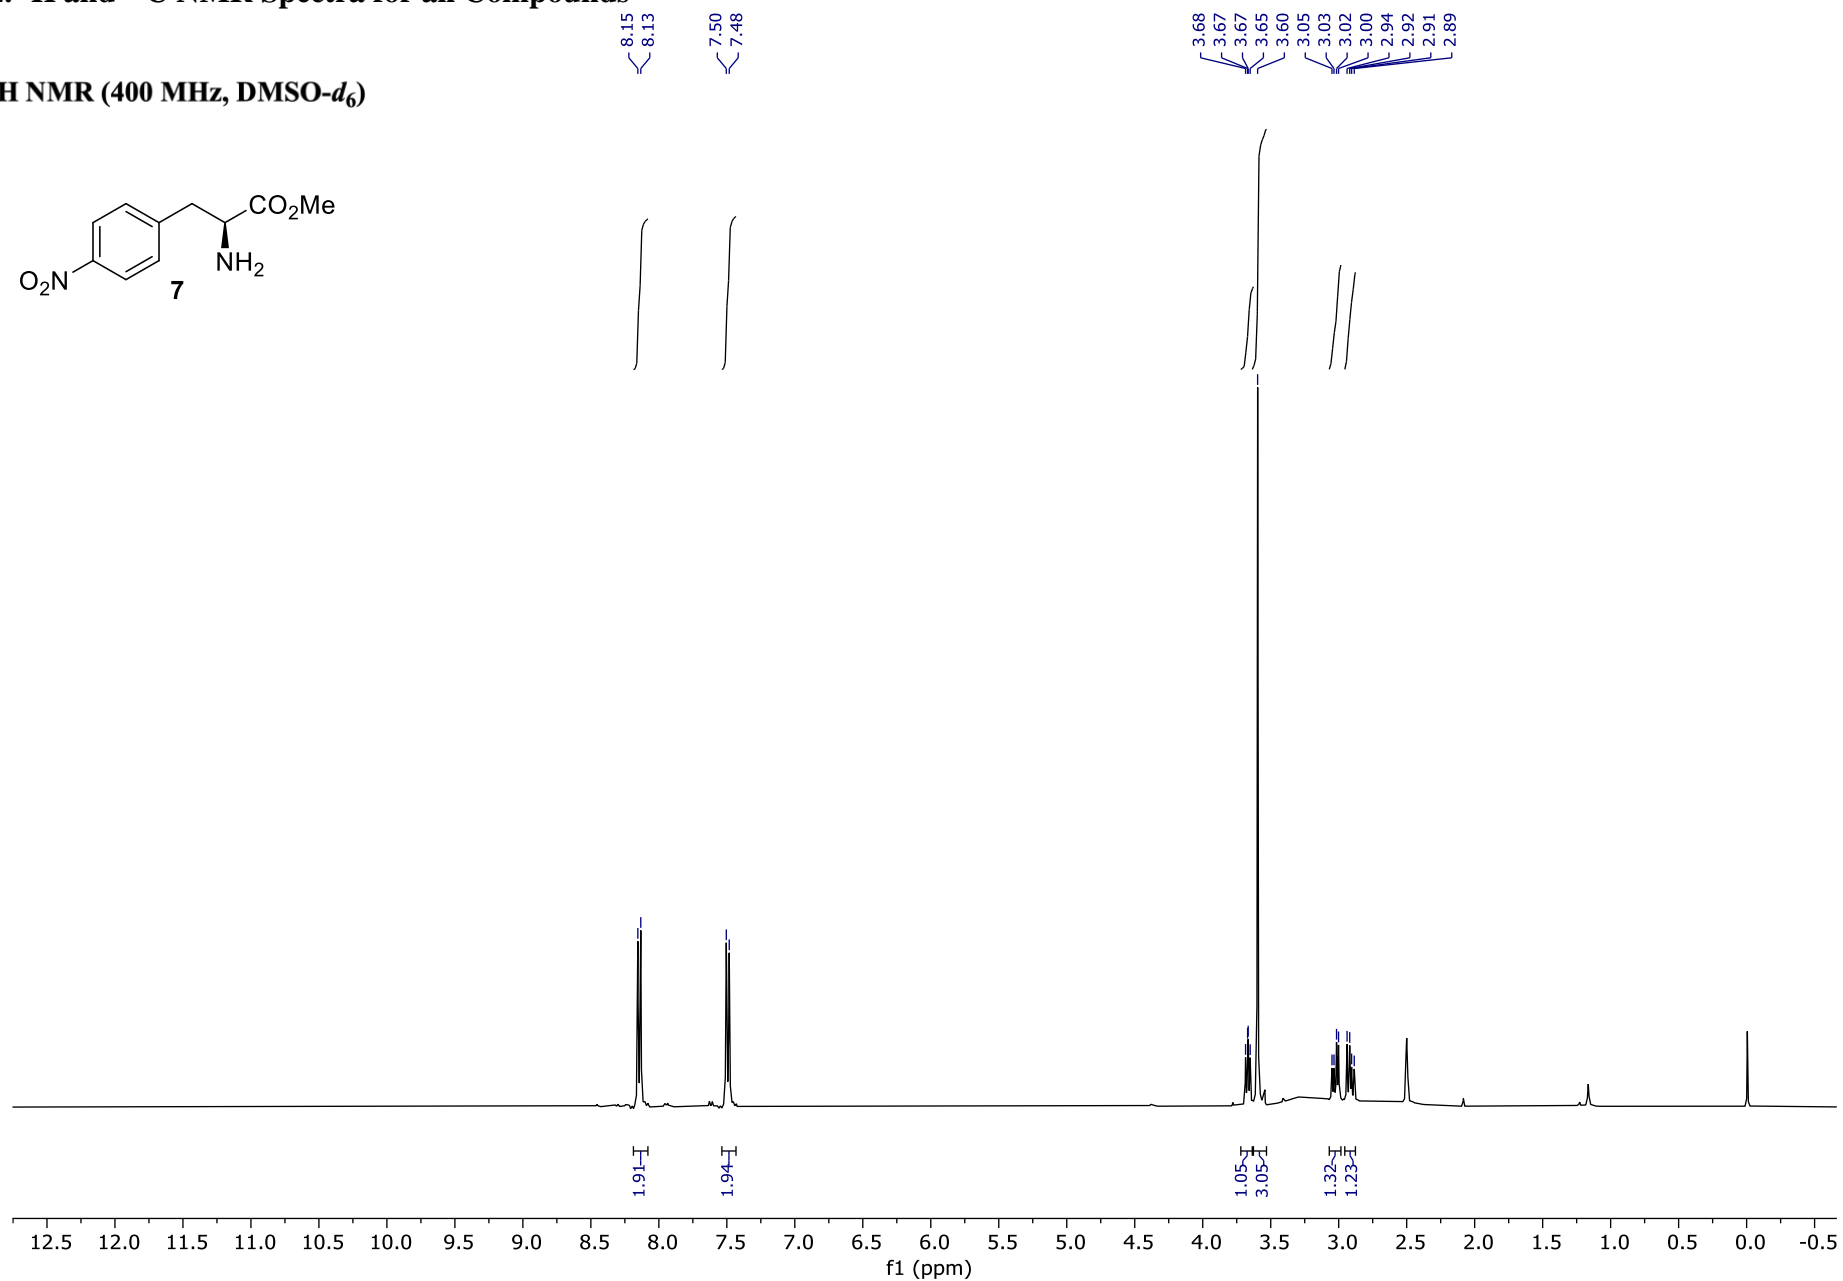

$^{13}\text{C}\{^1\text{H}\}$  NMR (101 MHz,  $\text{DMSO-}d_6$ )

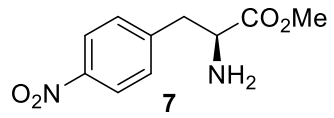

174.80

146.52  
146.19

130.62

123.13

55.18

51.58

39.88

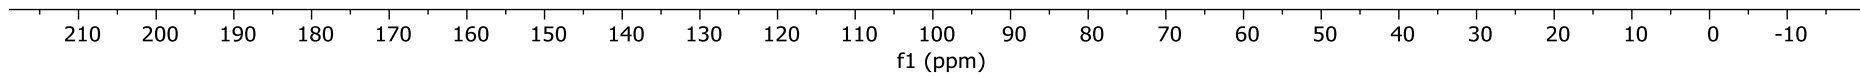



**<sup>1</sup>H NMR (400 MHz, CDCl<sub>3</sub>)**

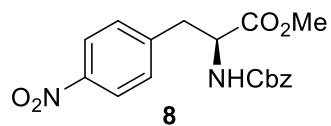

8.12, 8.10, 7.39, 7.38, 7.37, 7.36, 7.35, 7.34, 7.33, 7.31, 7.27, 7.26, 7.25, 5.30, 5.28, 5.13, 5.10, 5.07, 5.04, 4.73, 4.71, 4.69, 4.68, 3.74, 3.32, 3.31, 3.29, 3.27, 3.16, 3.15, 3.13, 3.11

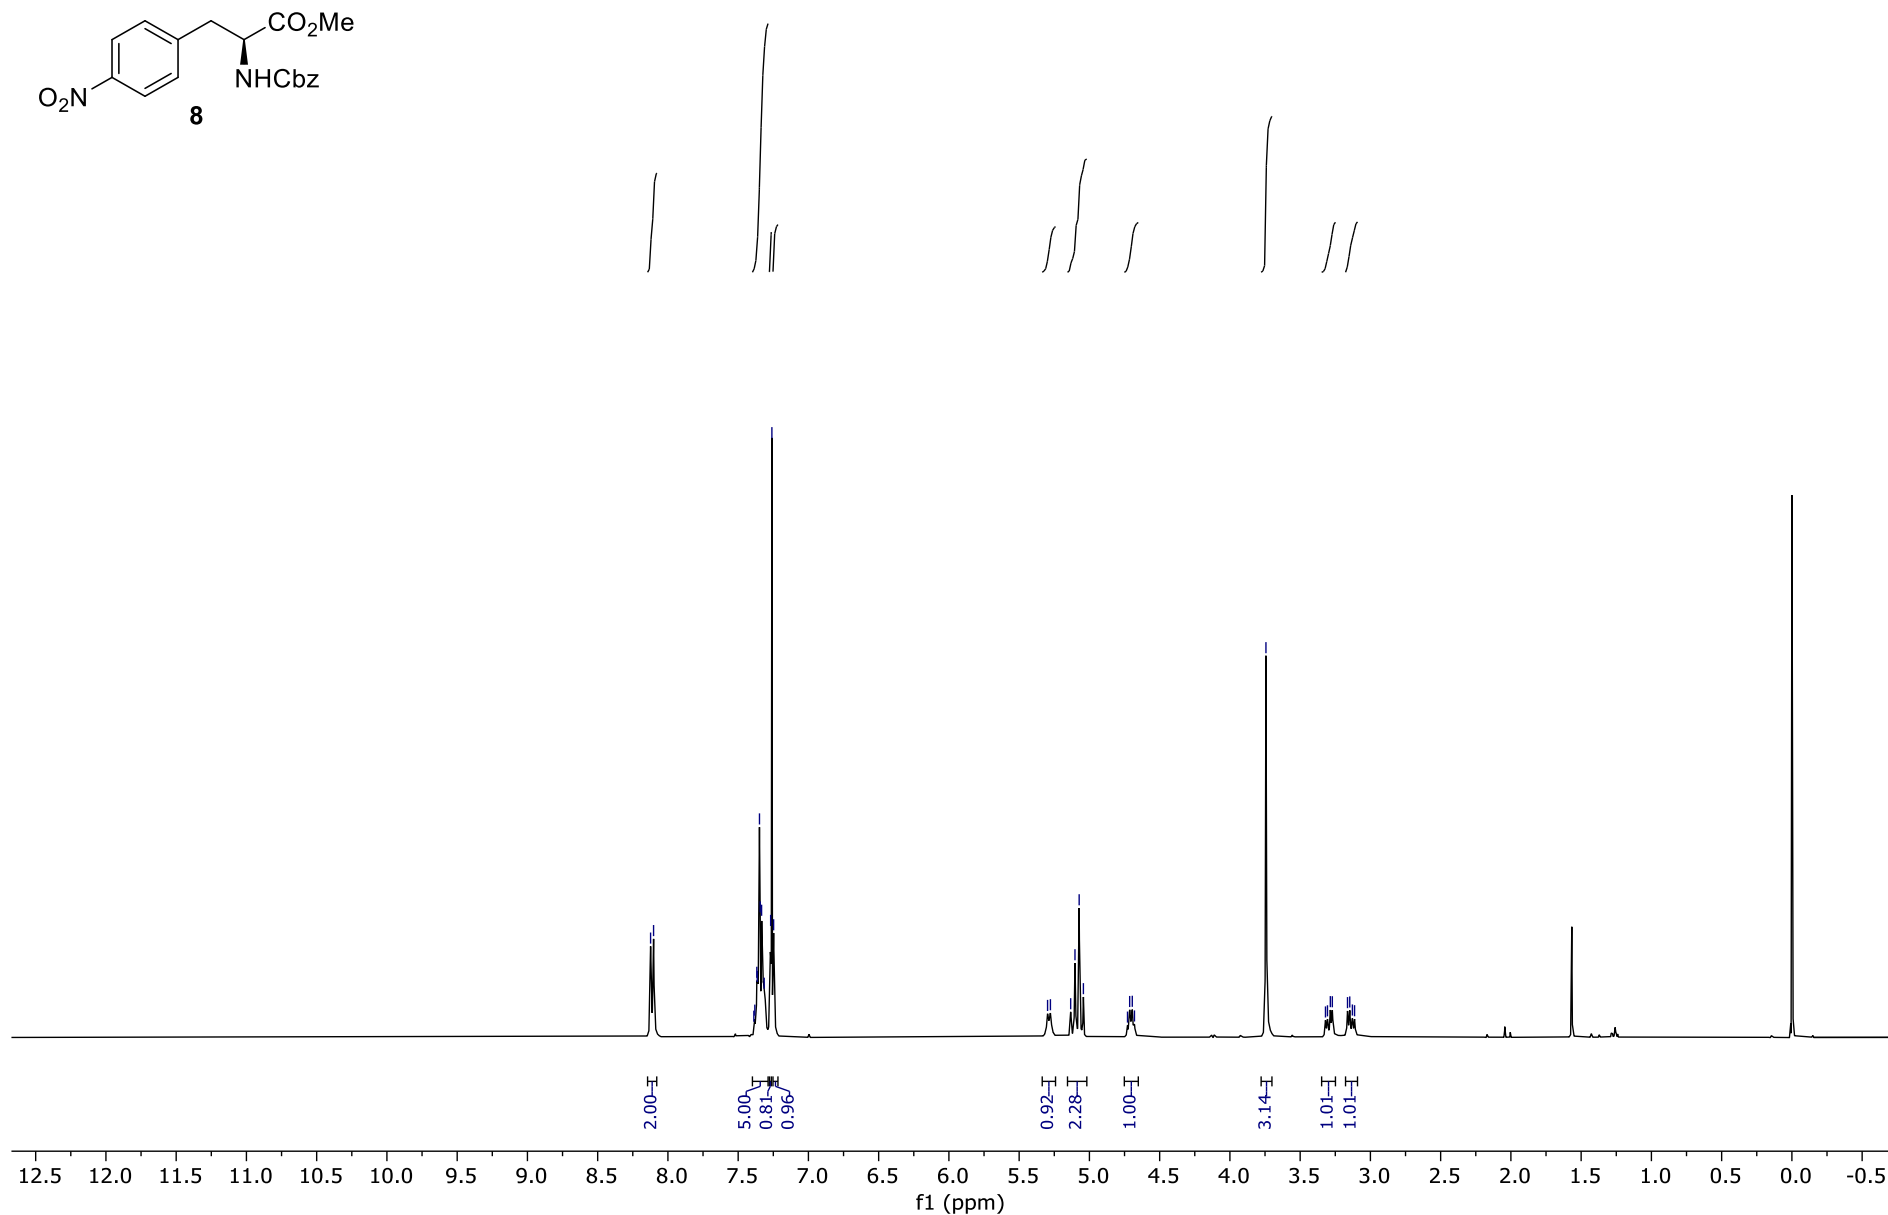

$^{13}\text{C}\{^1\text{H}\}$  NMR (101 MHz,  $\text{CDCl}_3$ )

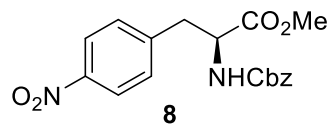

— 171.40  
— 155.59  
— 147.32  
— 143.76  
— 136.14  
— 130.34  
— 128.72  
— 128.54  
— 128.35  
— 123.85

— 67.33  
— 54.60  
— 52.81  
— 38.36

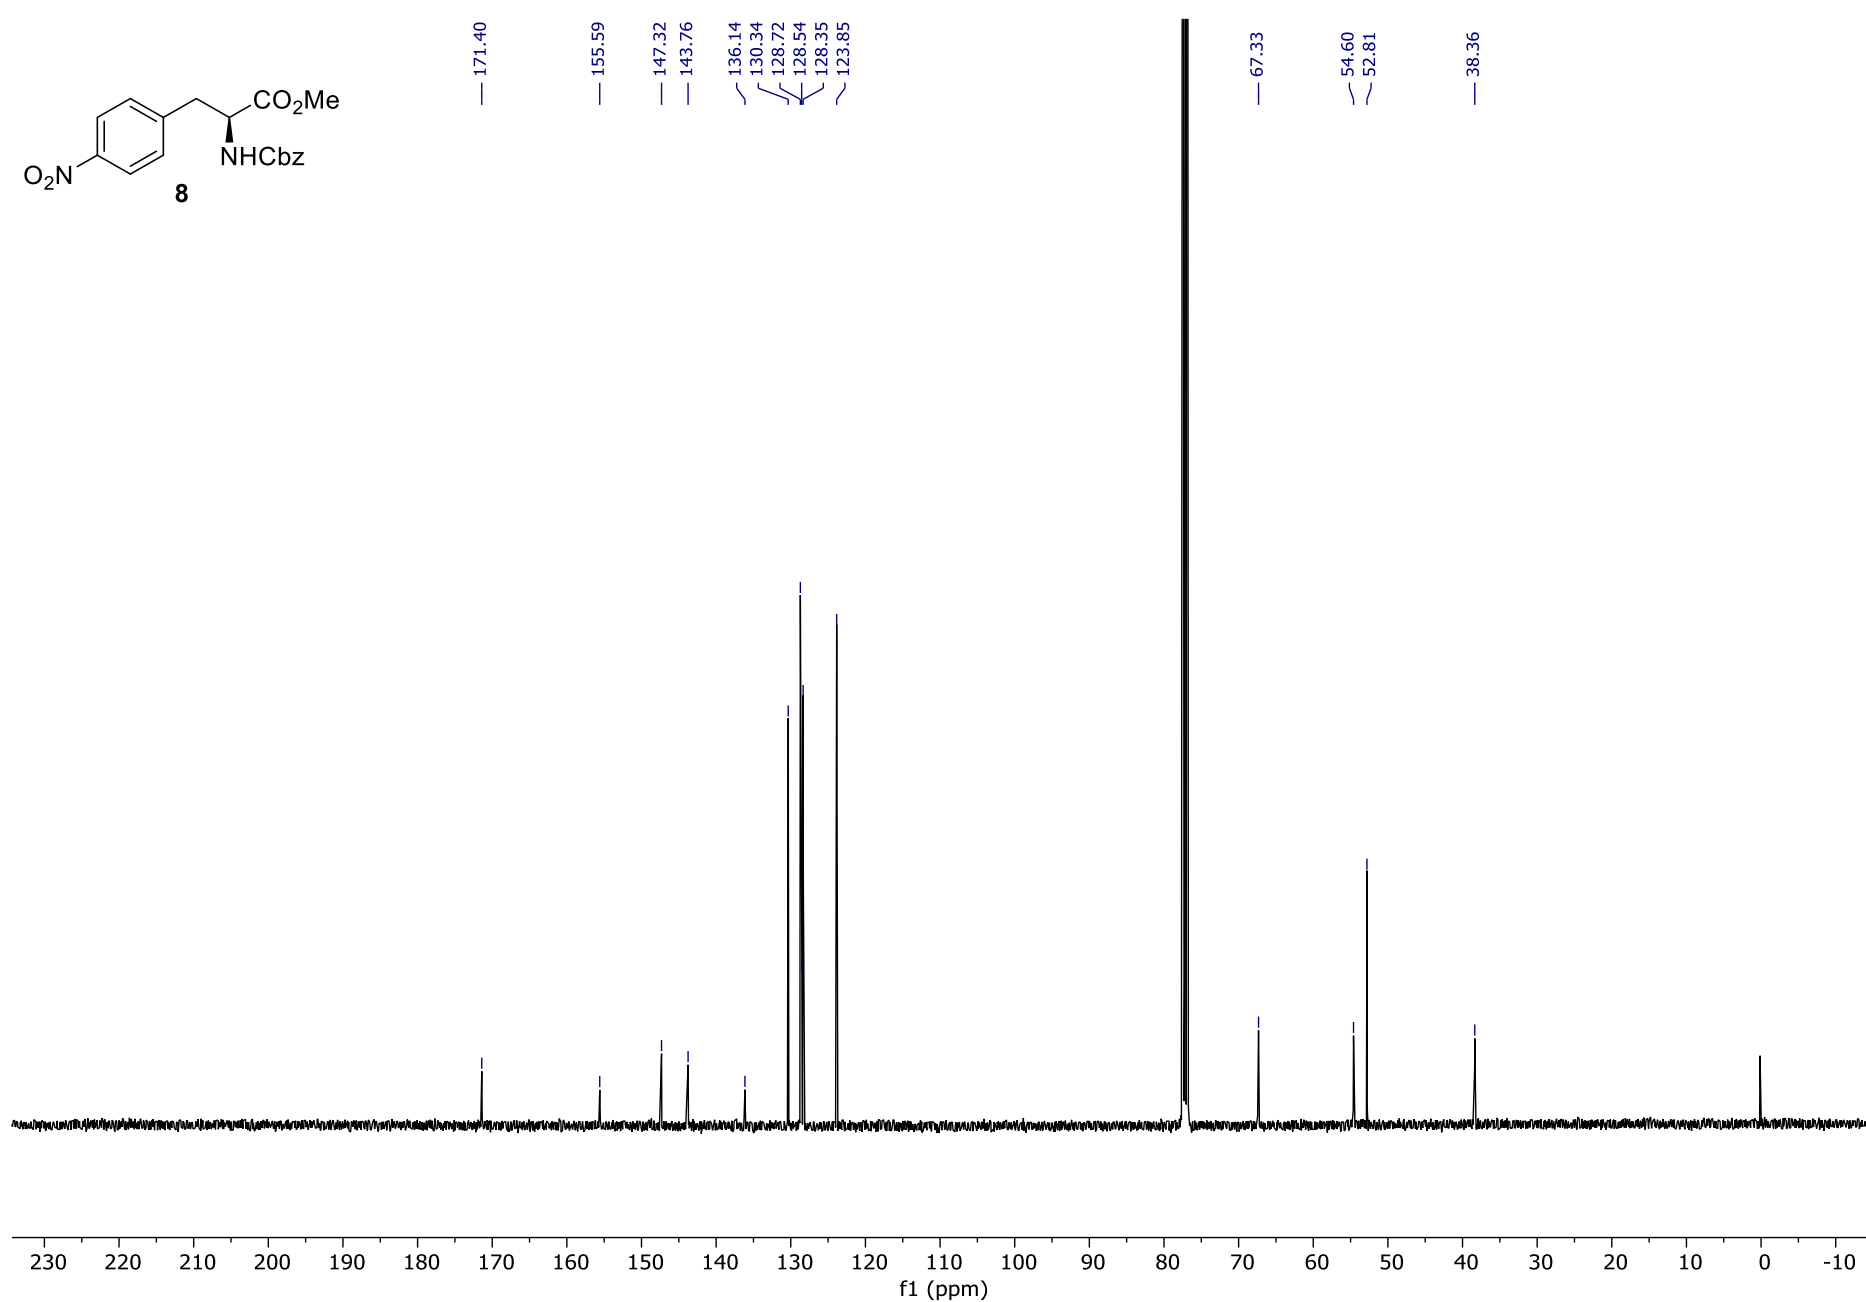

**<sup>1</sup>H NMR (400 MHz, CDCl<sub>3</sub>)**

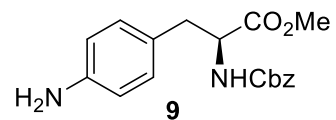

7.38  
7.37  
7.36  
7.36  
7.34  
7.33  
7.32  
7.31  
7.30  
7.30  
7.29  
6.89  
6.88  
6.87  
6.86  
6.86  
6.85  
6.61  
6.60  
6.59  
6.58  
6.58  
6.57  
5.19  
5.17  
5.13  
5.10  
5.09  
5.06  
4.61  
4.60  
4.58  
4.56  
3.71  
3.61  
3.01  
3.00  
2.99  
2.99

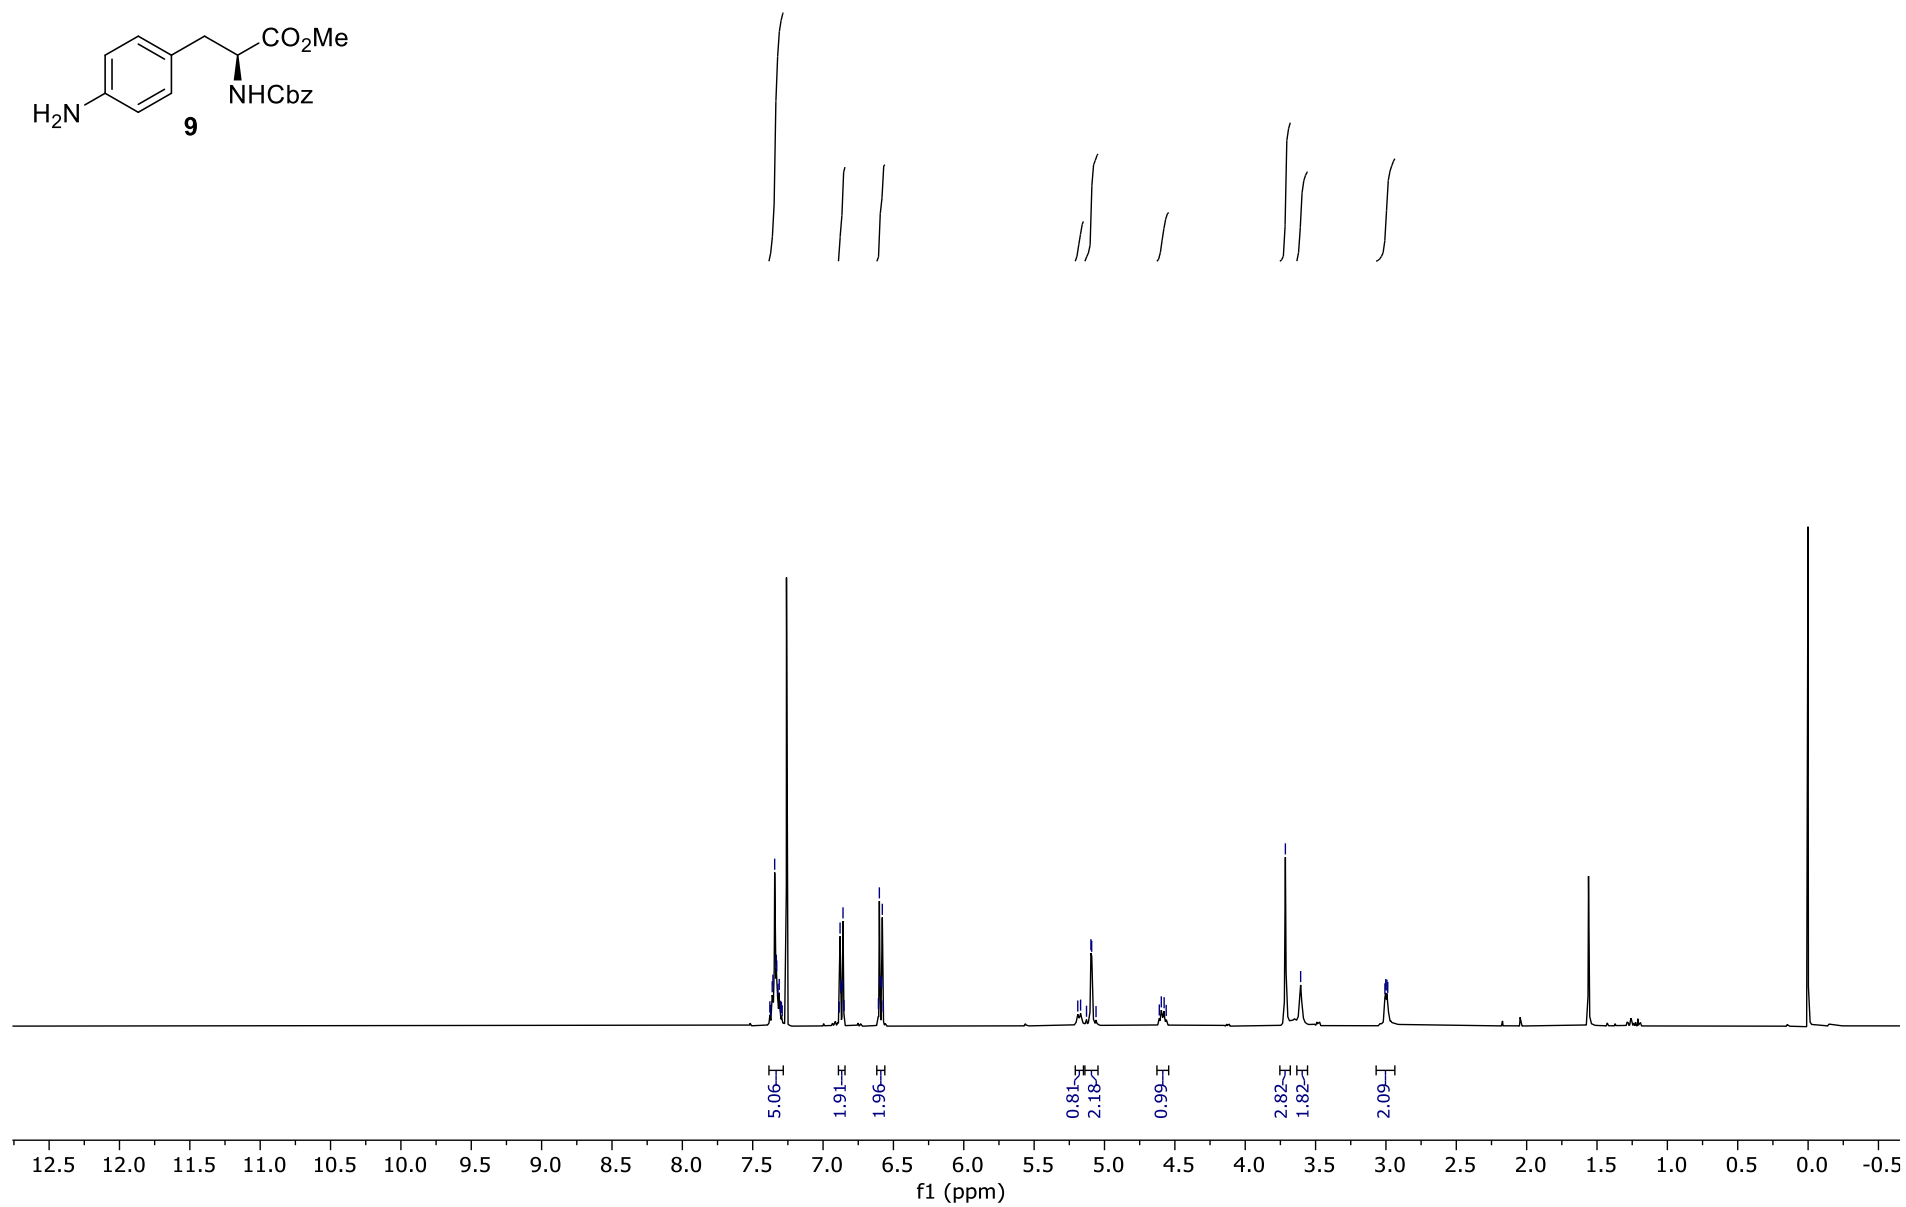

$^{13}\text{C}\{^1\text{H}\}$  NMR (101 MHz,  $\text{CDCl}_3$ )

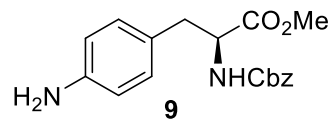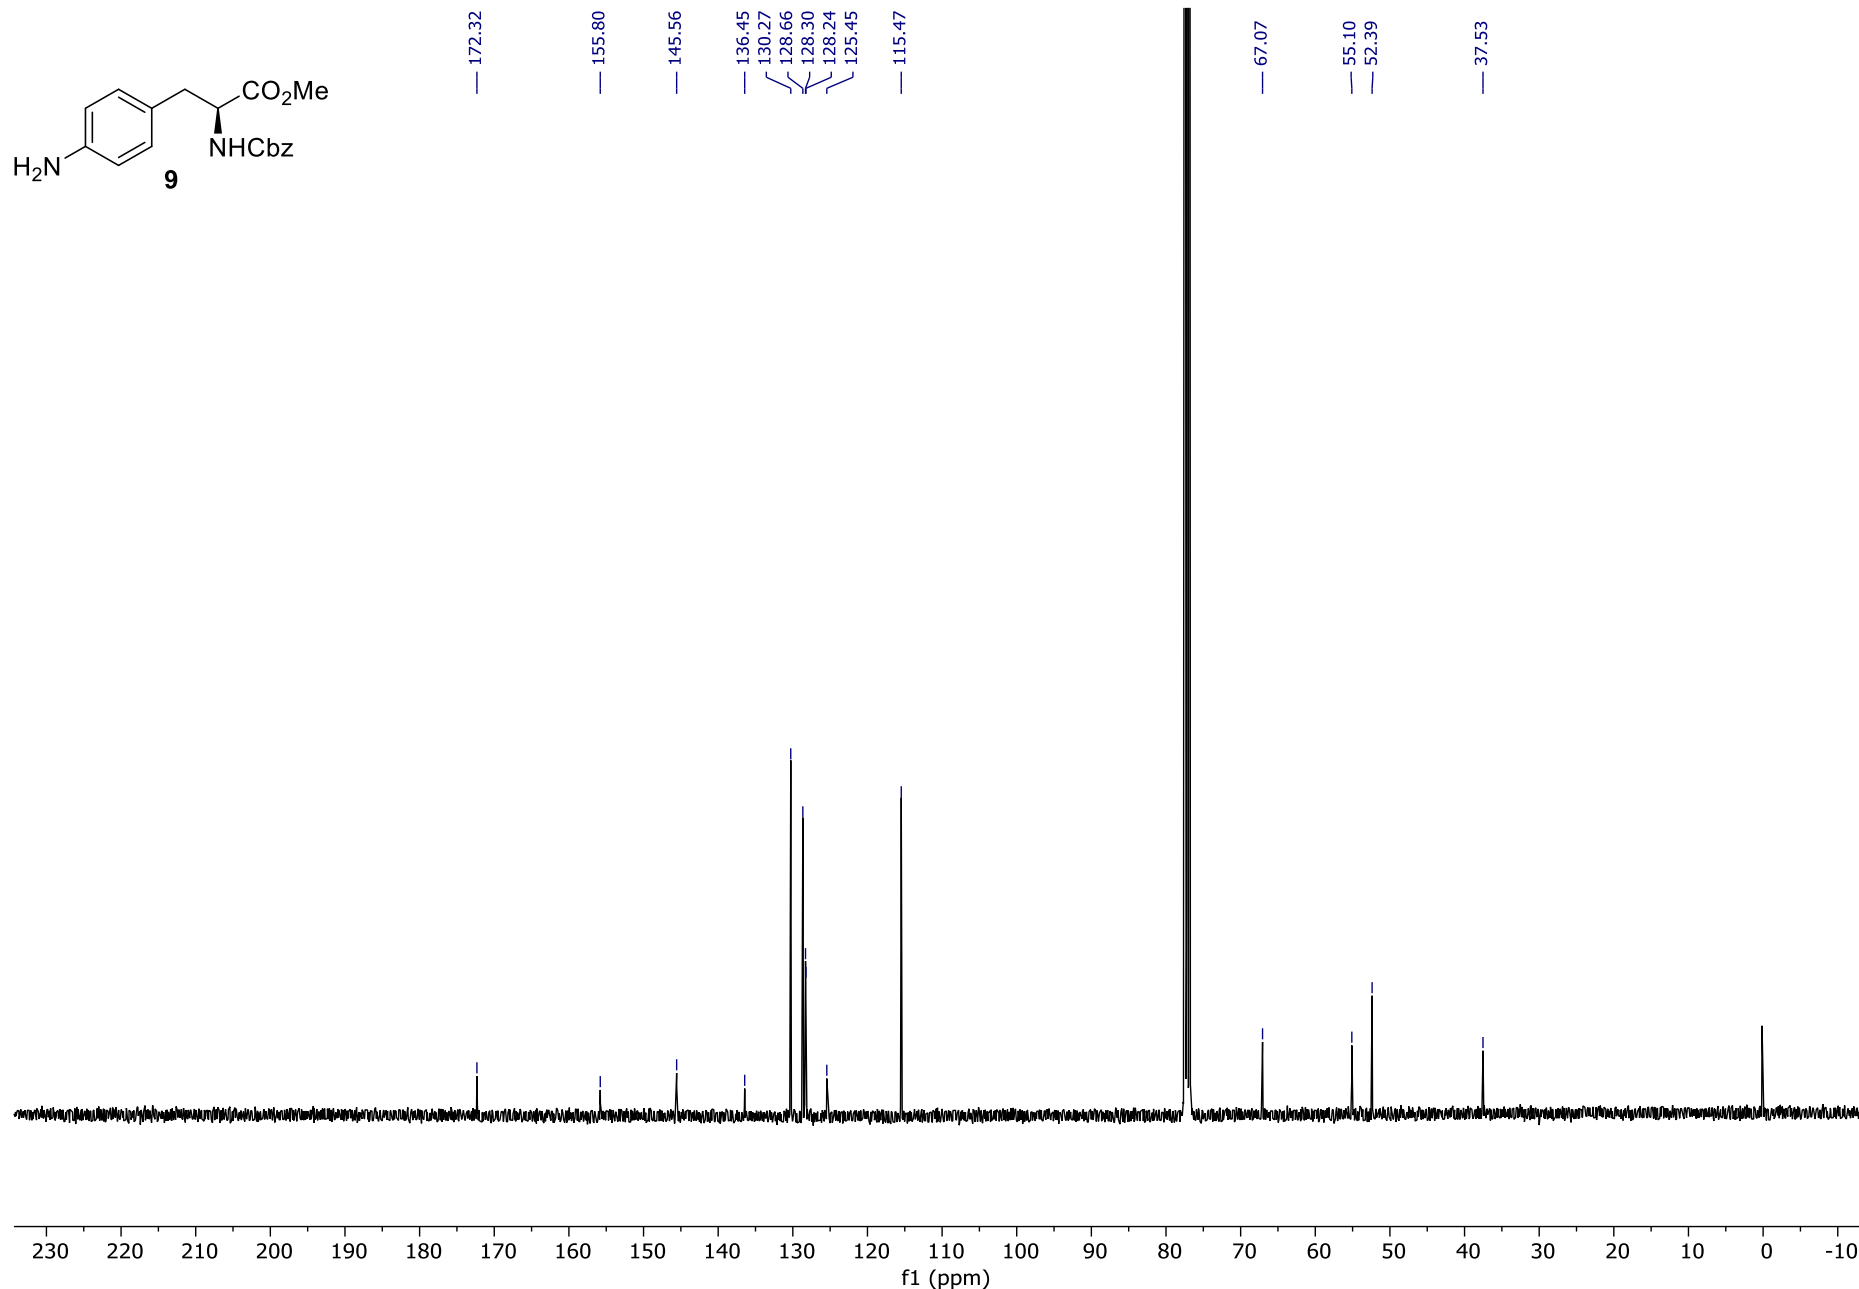

**<sup>1</sup>H NMR (400 MHz, CDCl<sub>3</sub>)**

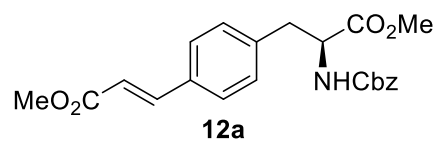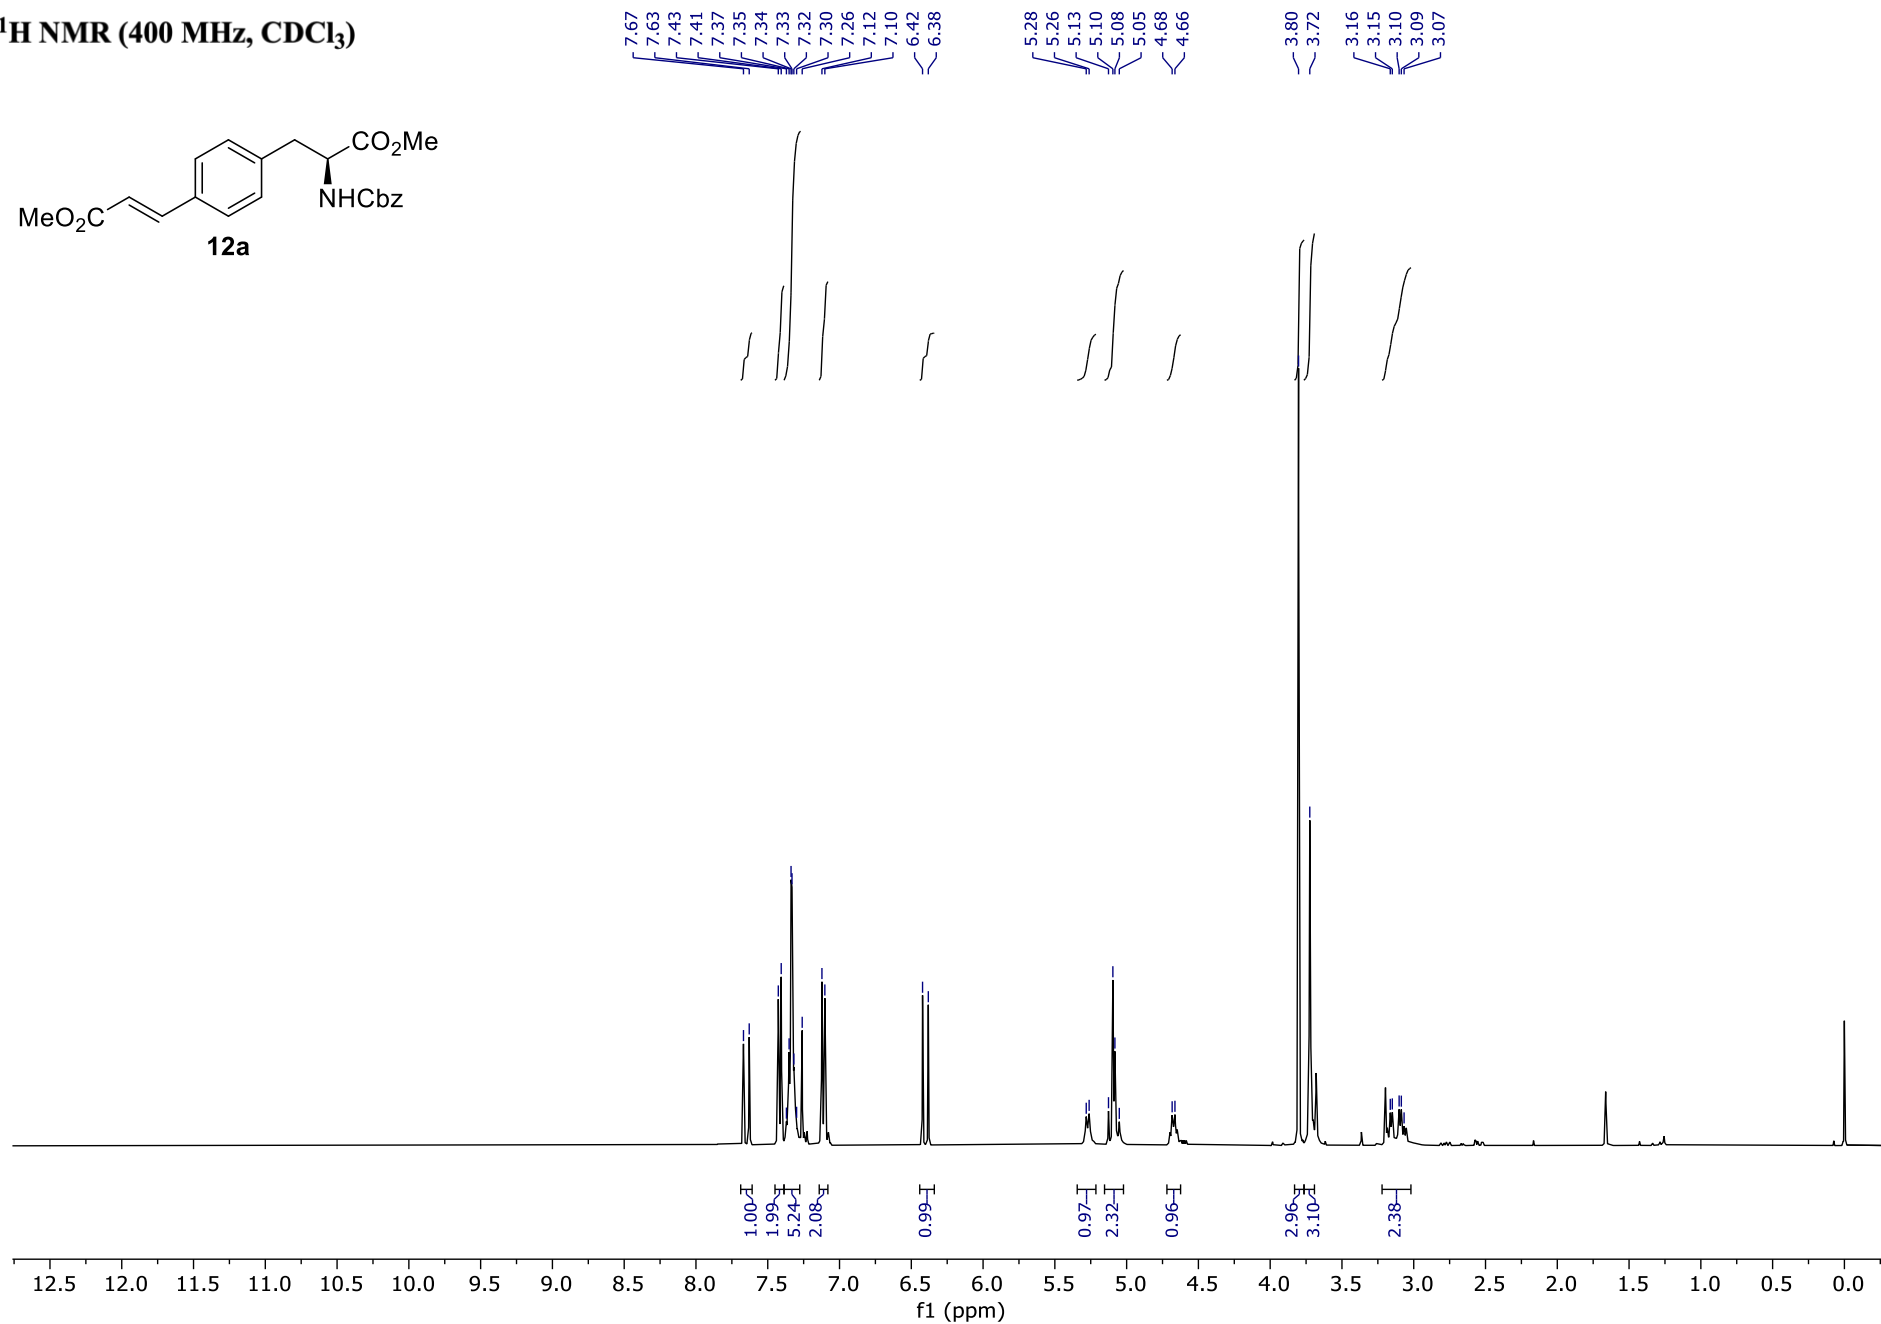

$^{13}\text{C}\{^1\text{H}\}$  NMR (101 MHz,  $\text{CDCl}_3$ )

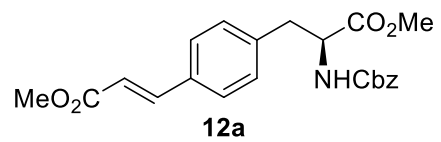

- 171.85
- 167.52
- 155.68
- 144.48
- 138.42
- 136.28
- 133.40
- 129.97
- 128.66
- 128.40
- 128.37
- 128.24
- 117.82
- 67.15
- 54.76
- 52.56
- 51.83
- 38.24

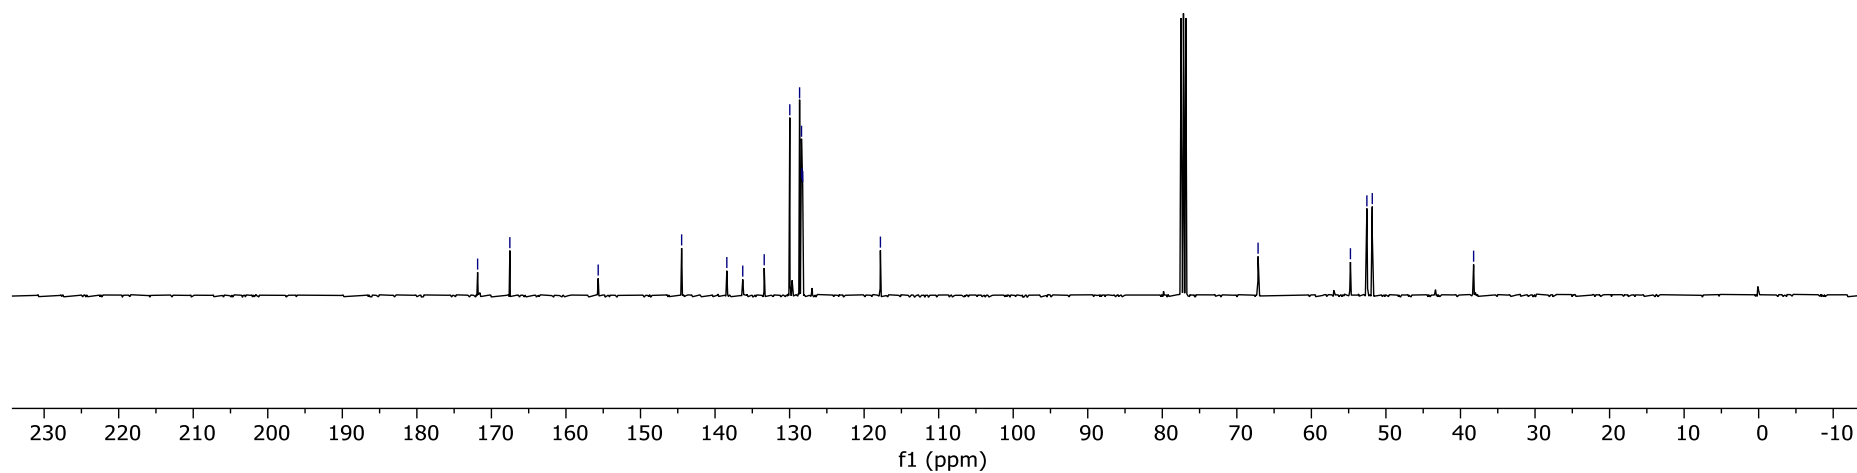

**<sup>1</sup>H NMR (400 MHz, CDCl<sub>3</sub>)**

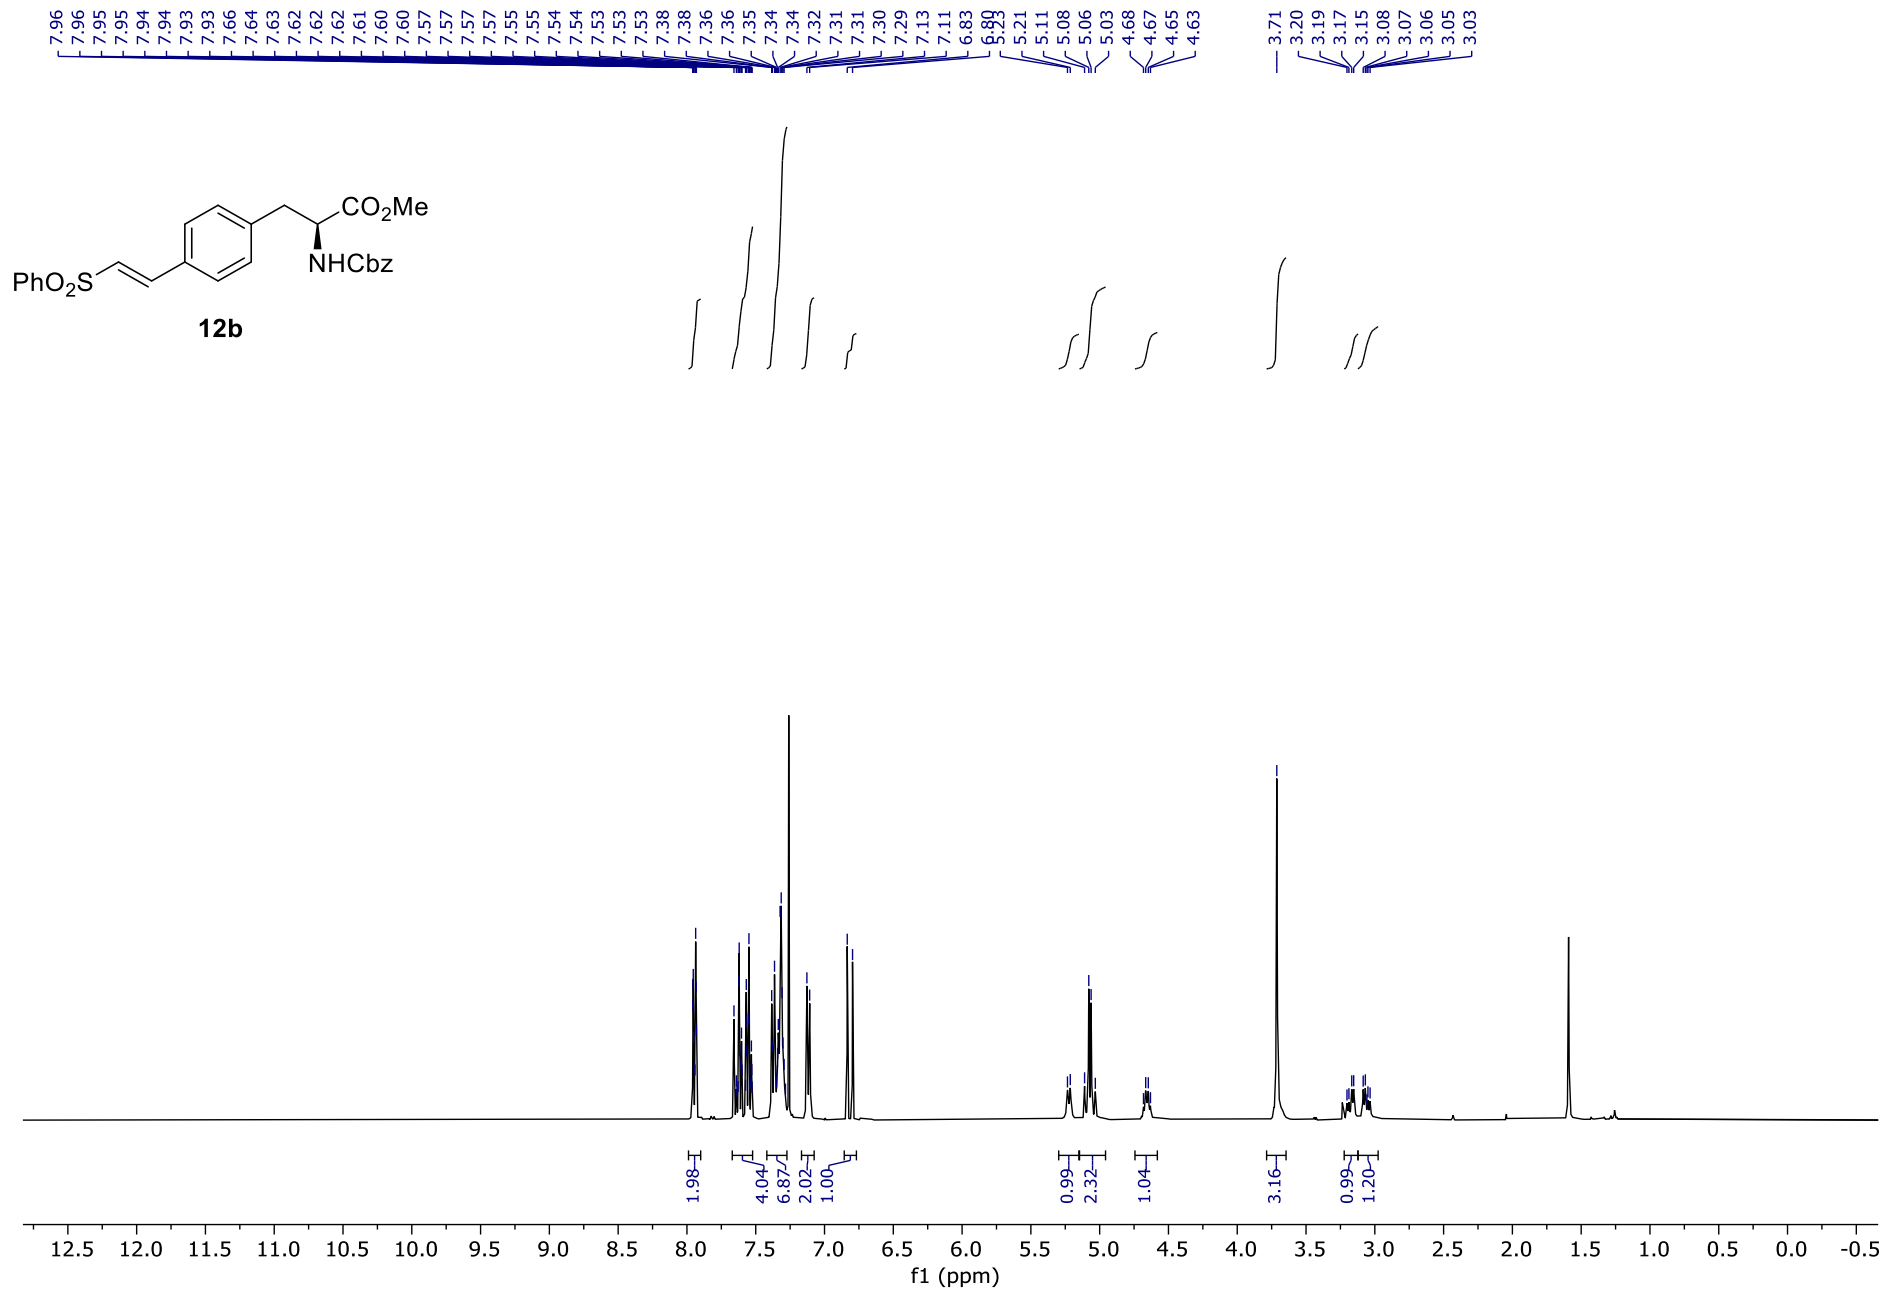

$^{13}\text{C}\{^1\text{H}\}$  NMR (101 MHz,  $\text{CDCl}_3$ )

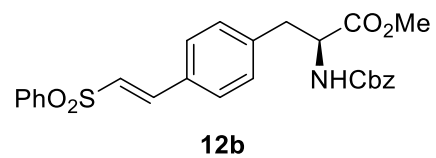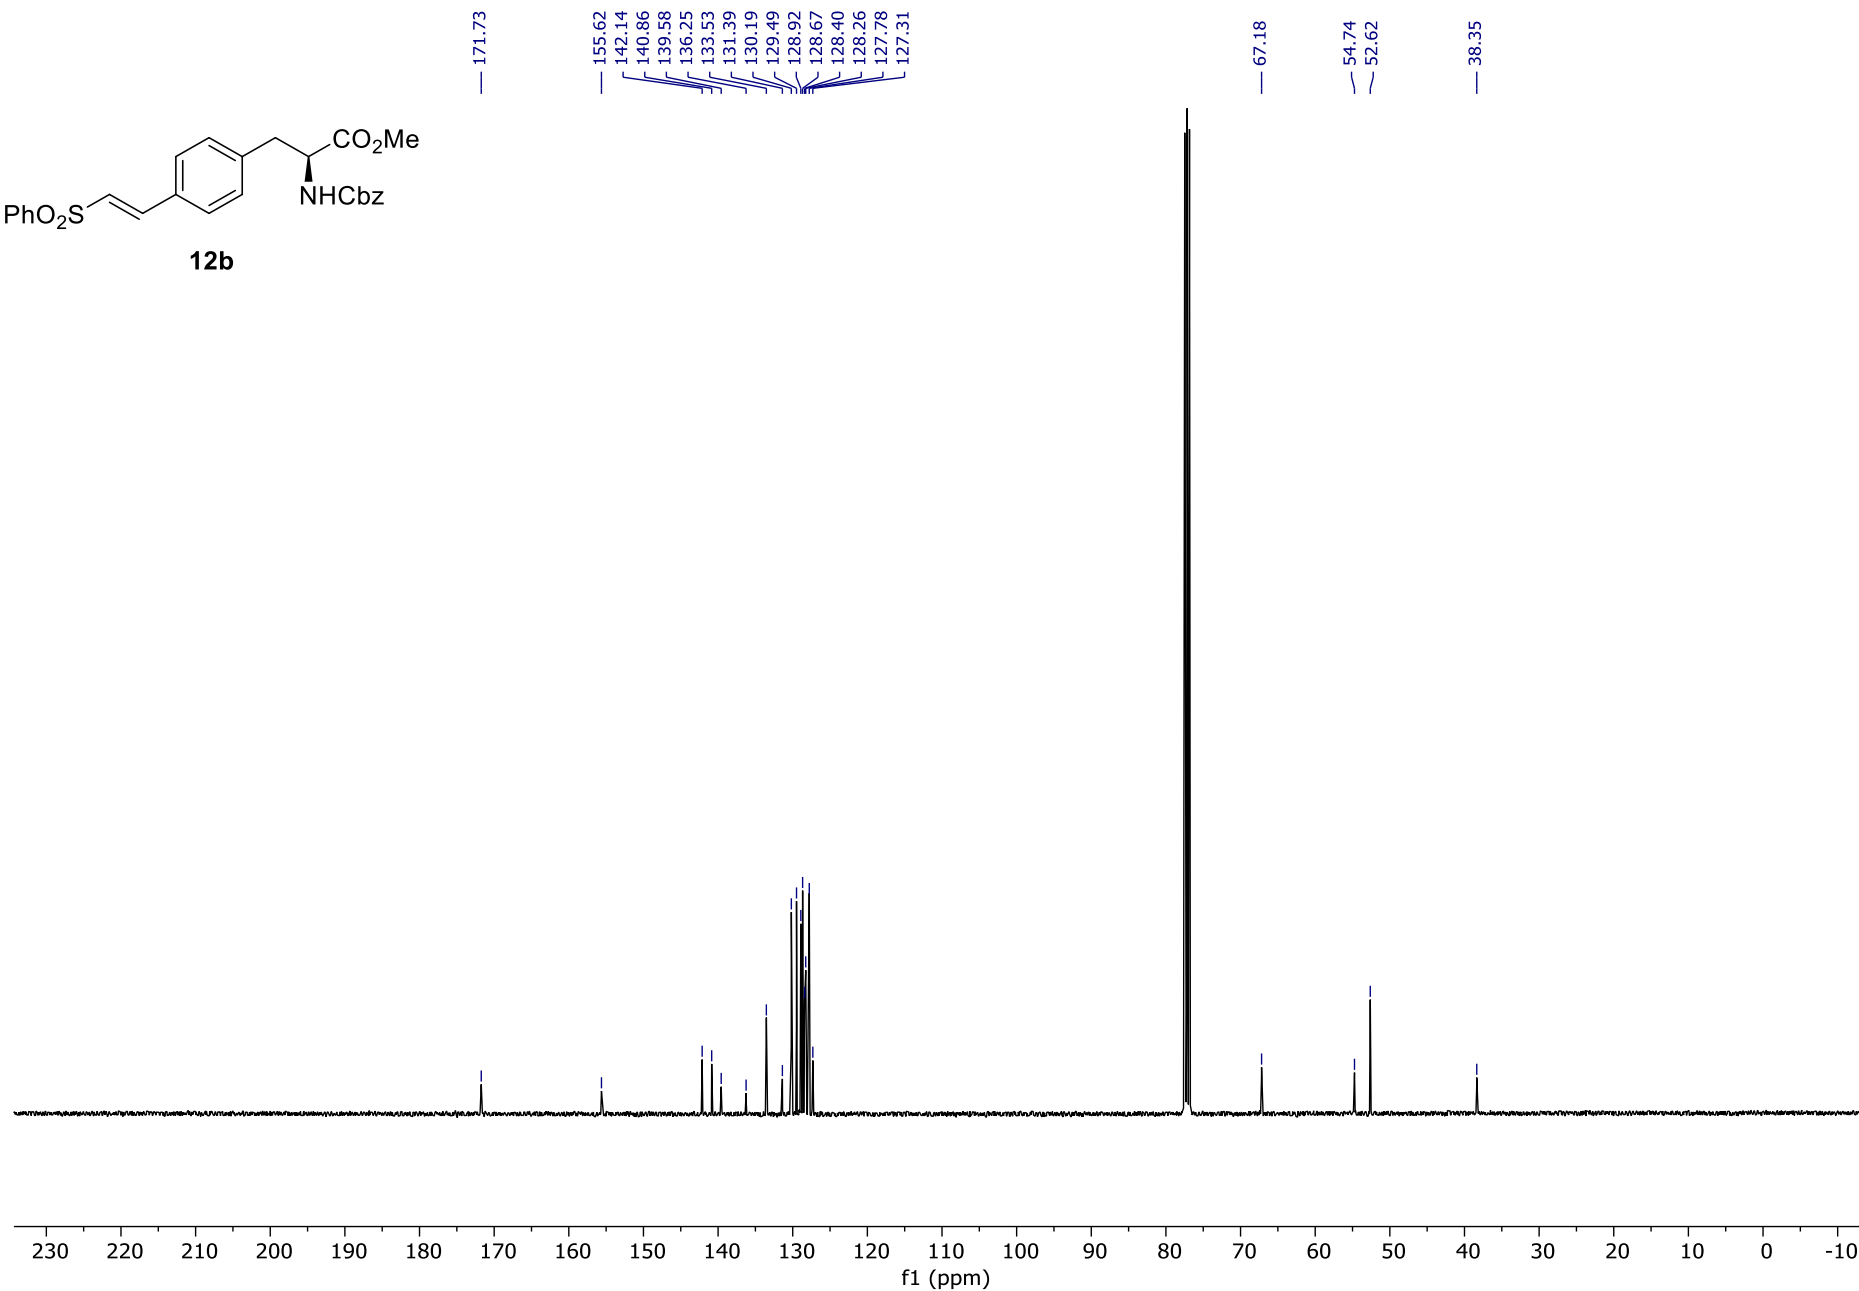



**<sup>1</sup>H NMR (400 MHz, CDCl<sub>3</sub>)**

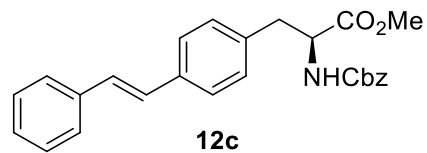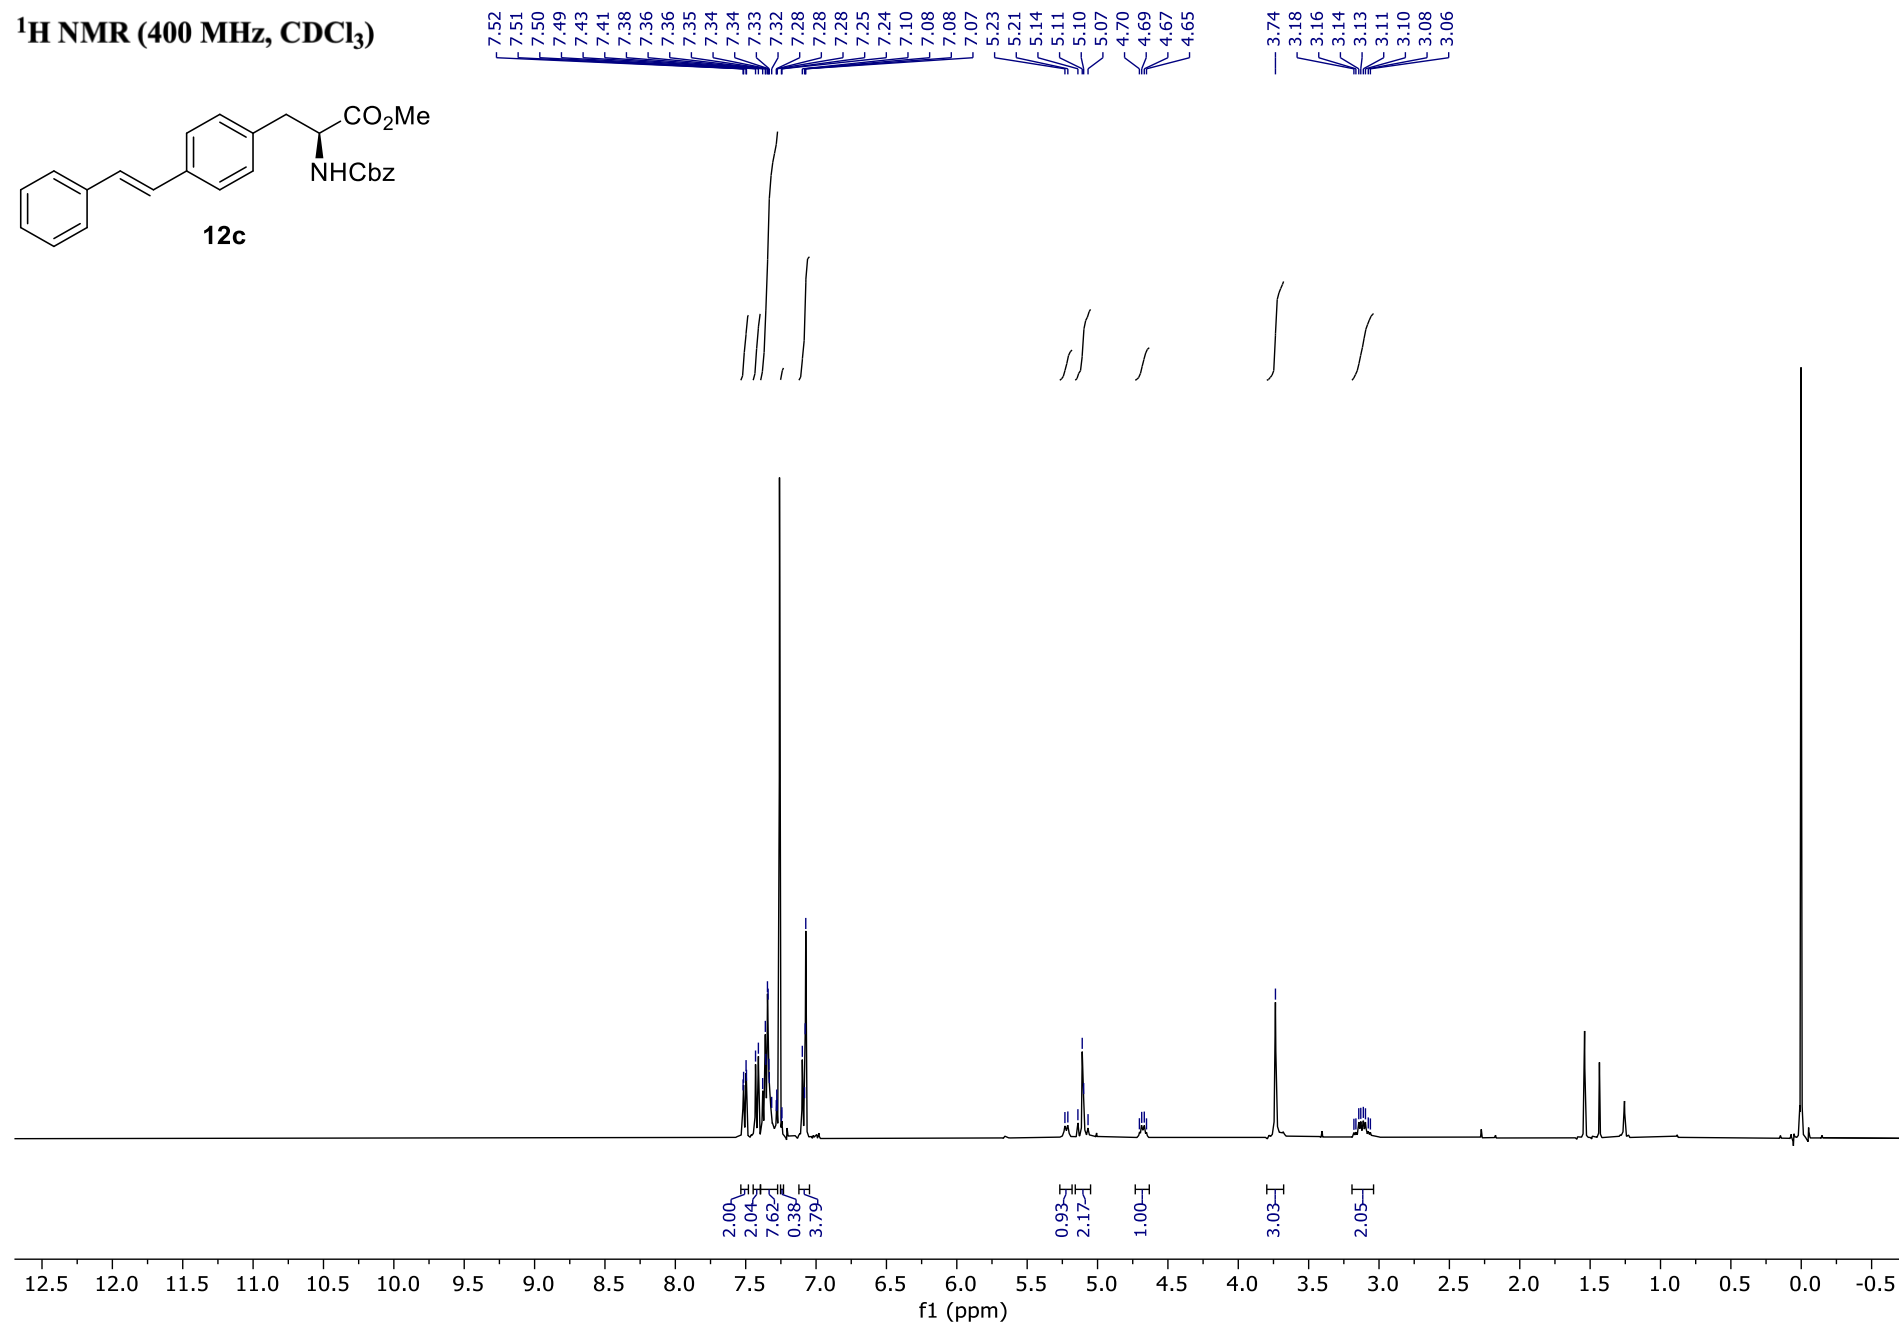

$^{13}\text{C}\{^1\text{H}\}$  NMR (101 MHz,  $\text{CDCl}_3$ )

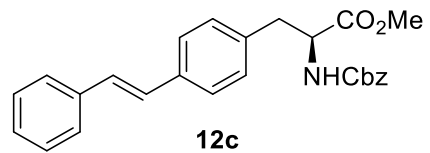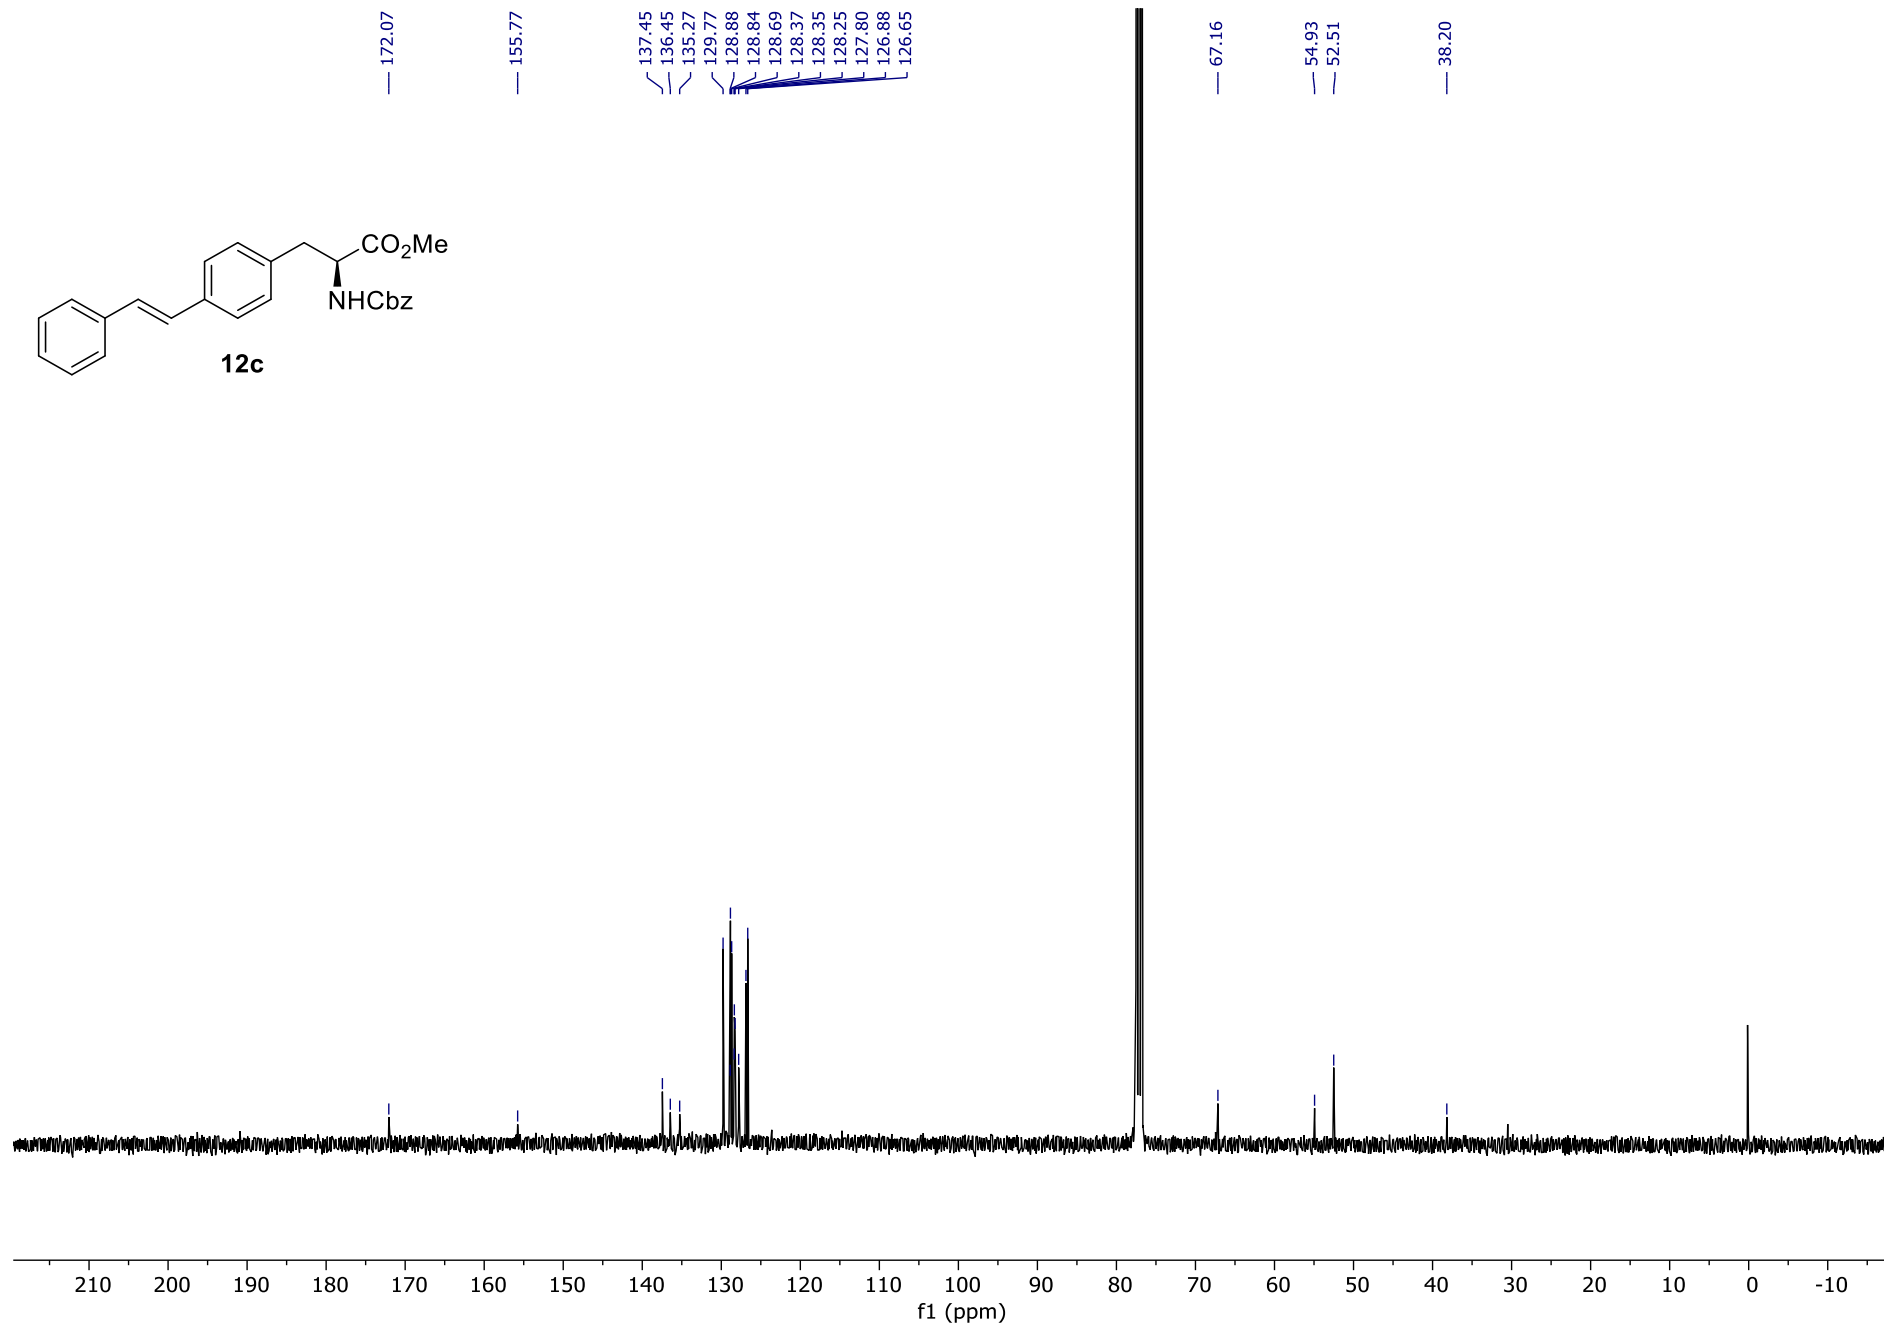

**<sup>1</sup>H NMR (400 MHz, CDCl<sub>3</sub>)**

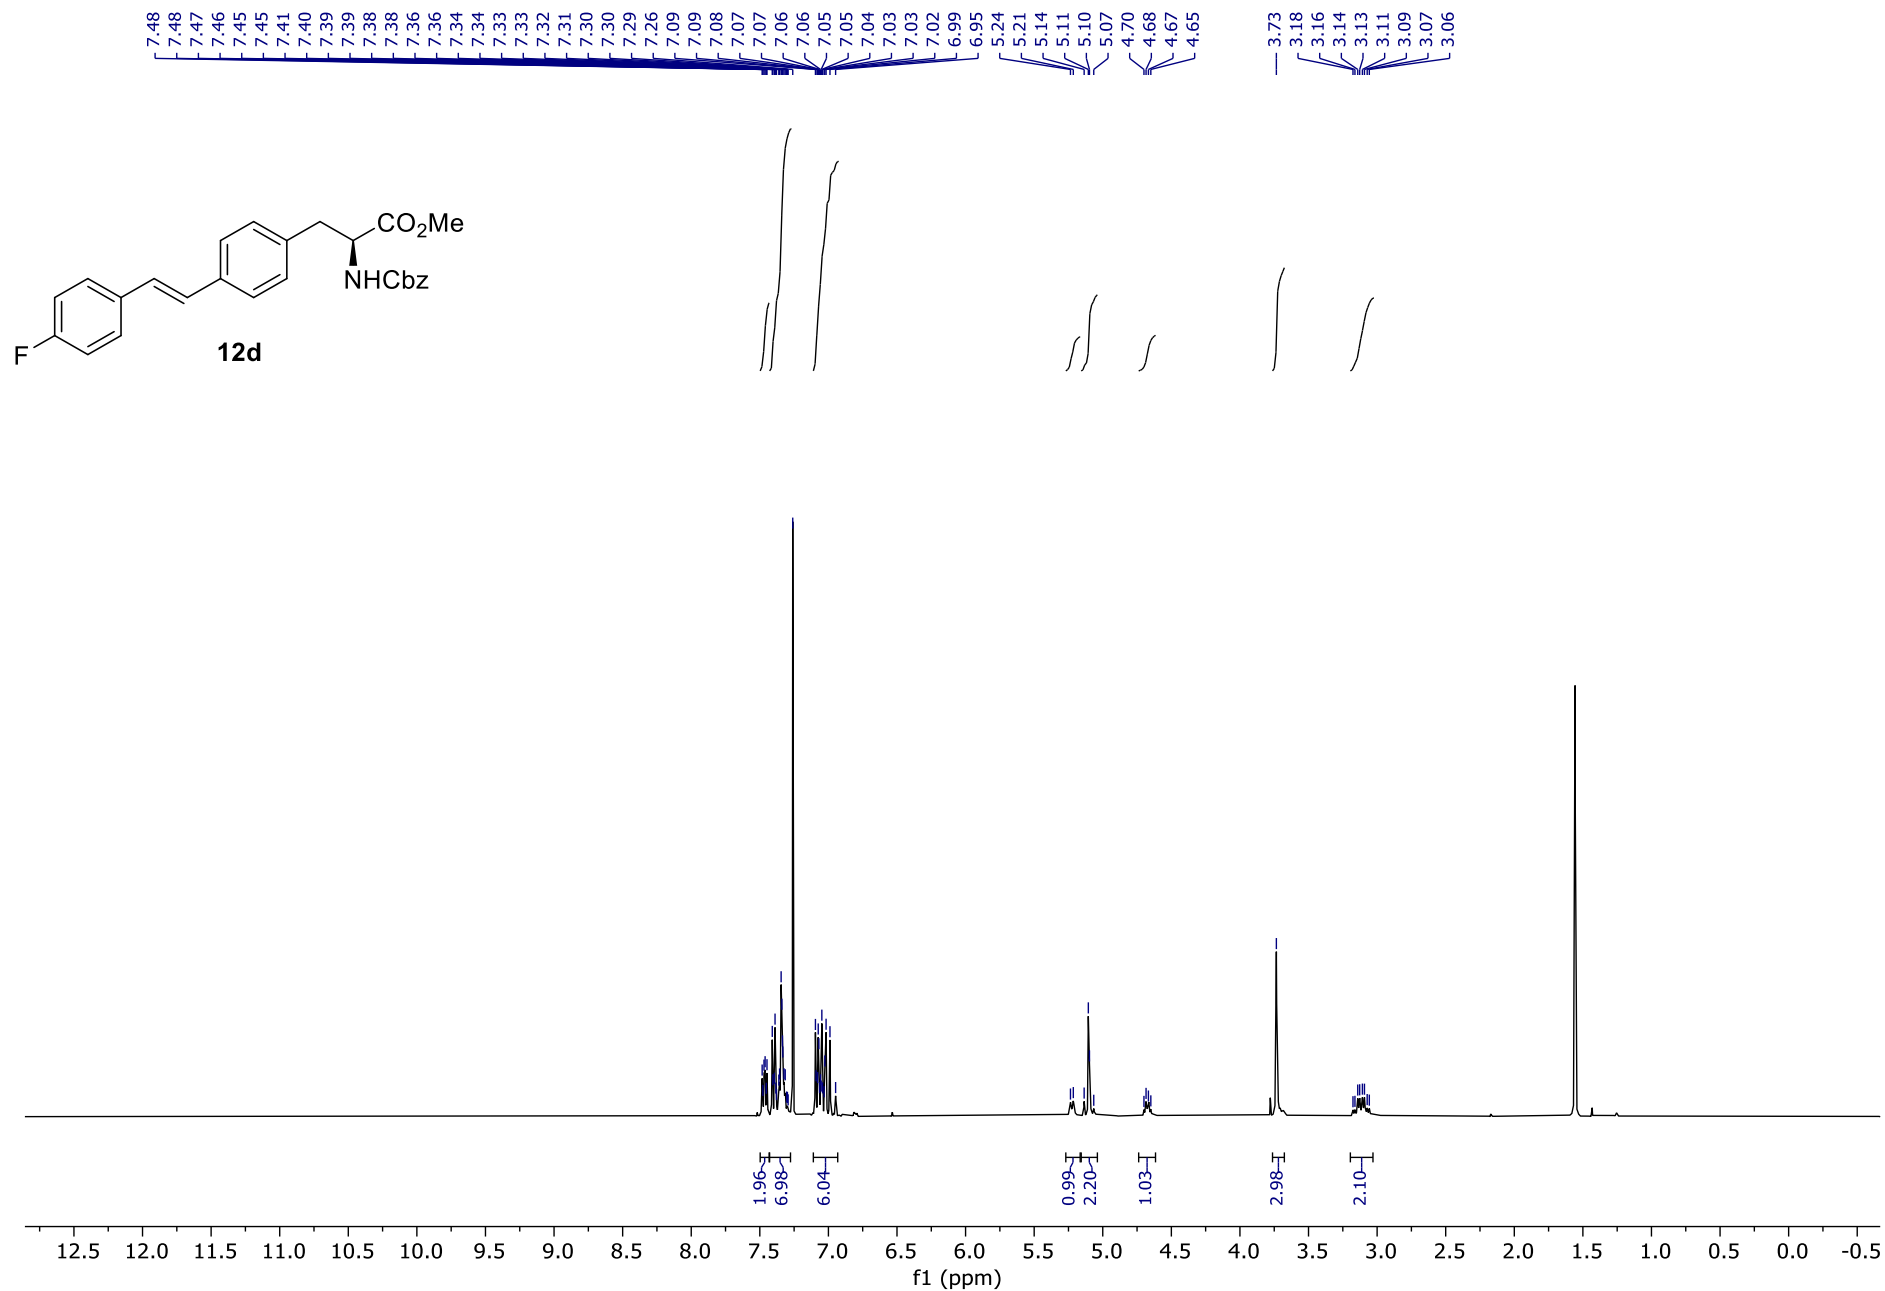

$^{13}\text{C}\{^1\text{H}\}$  NMR (101 MHz,  $\text{CDCl}_3$ )

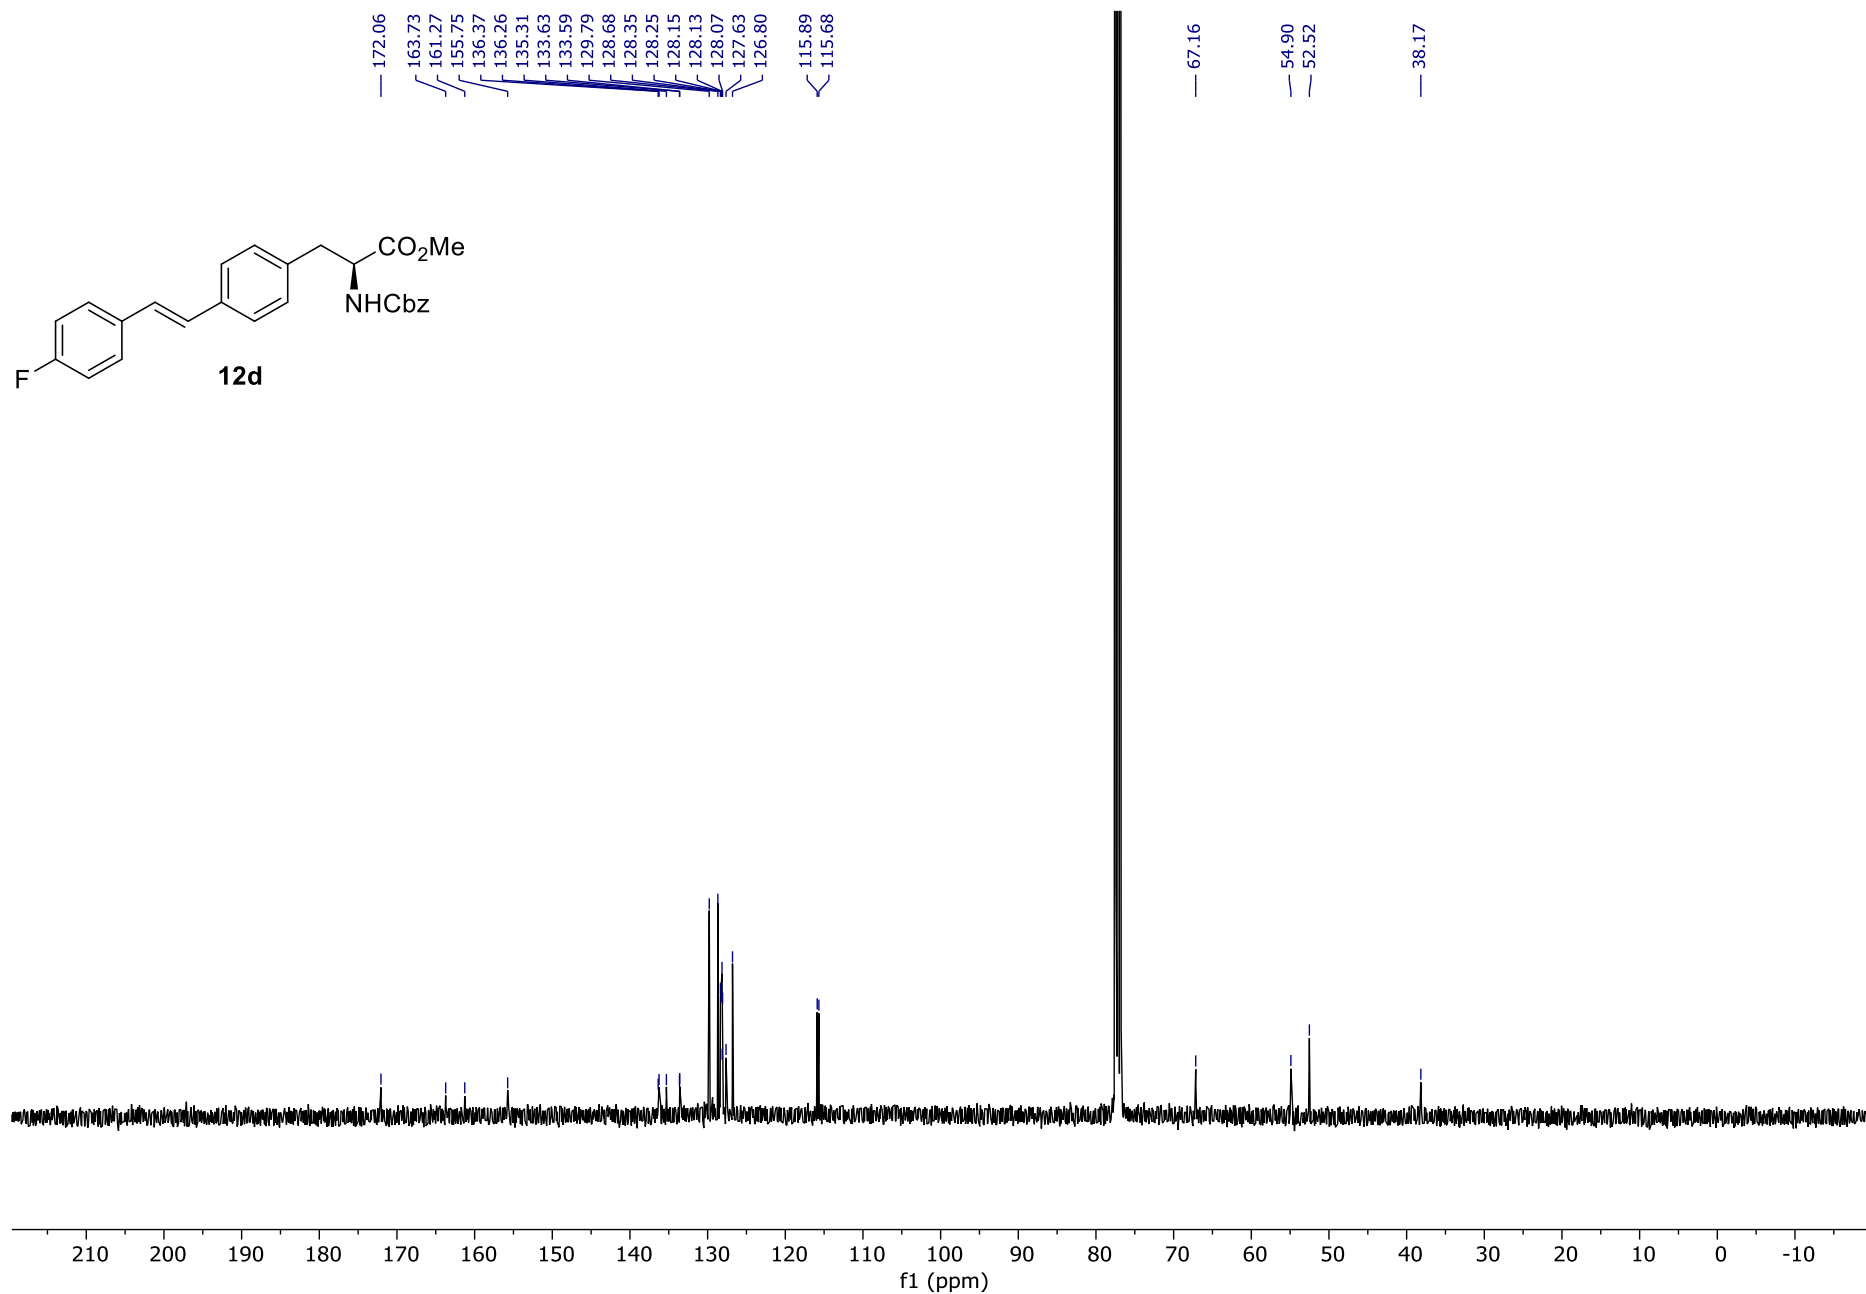

<sup>1</sup>H NMR (400 MHz, CDCl<sub>3</sub>)

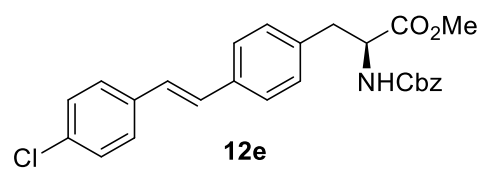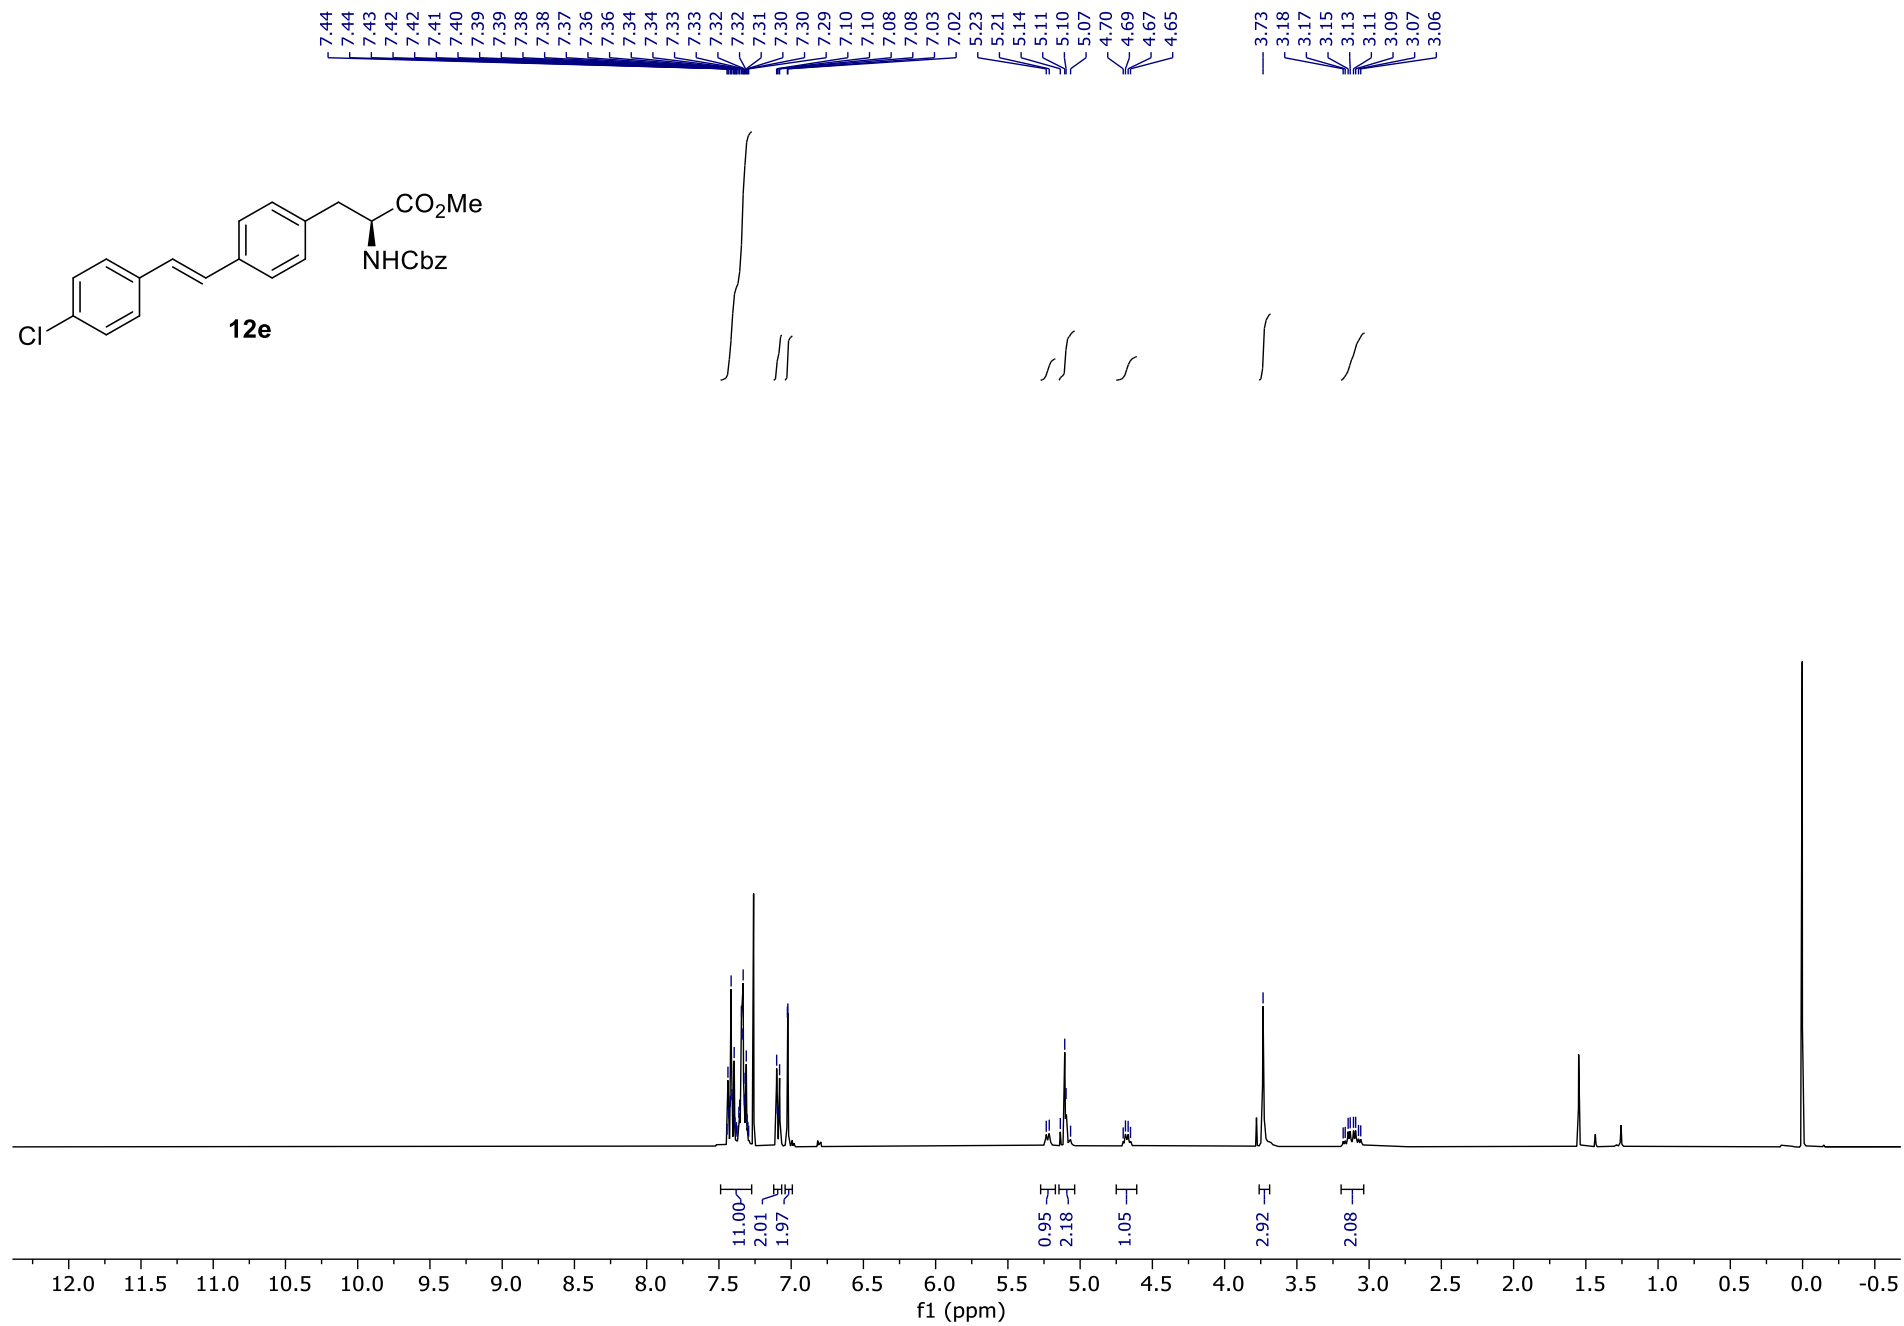

$^{13}\text{C}\{^1\text{H}\}$  NMR (101 MHz,  $\text{CDCl}_3$ )

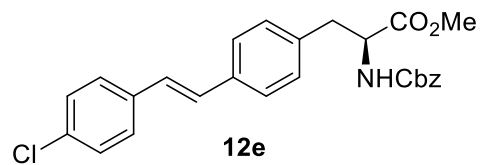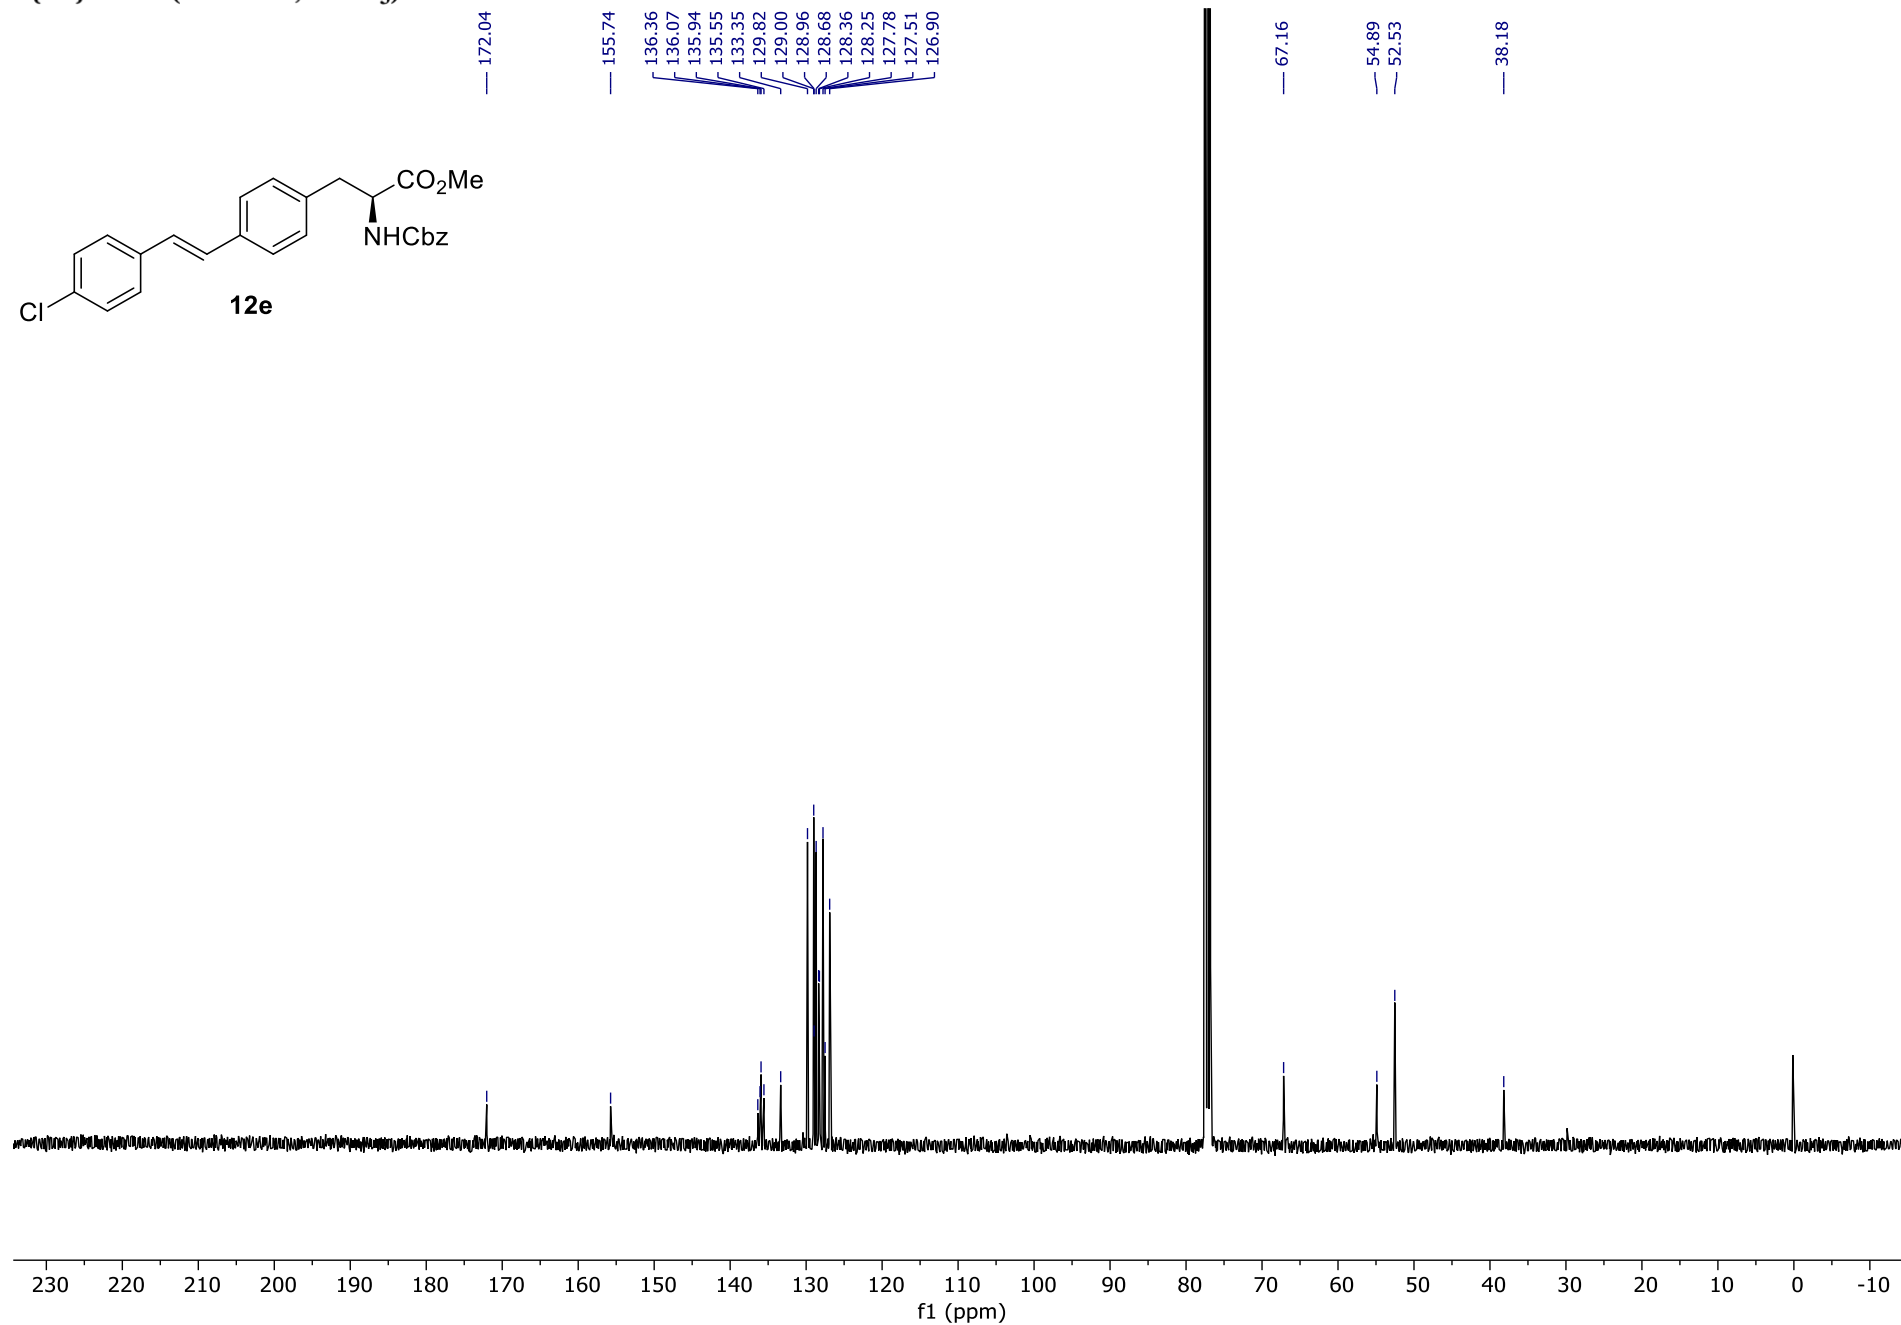

<sup>1</sup>H NMR (400 MHz, CDCl<sub>3</sub>)

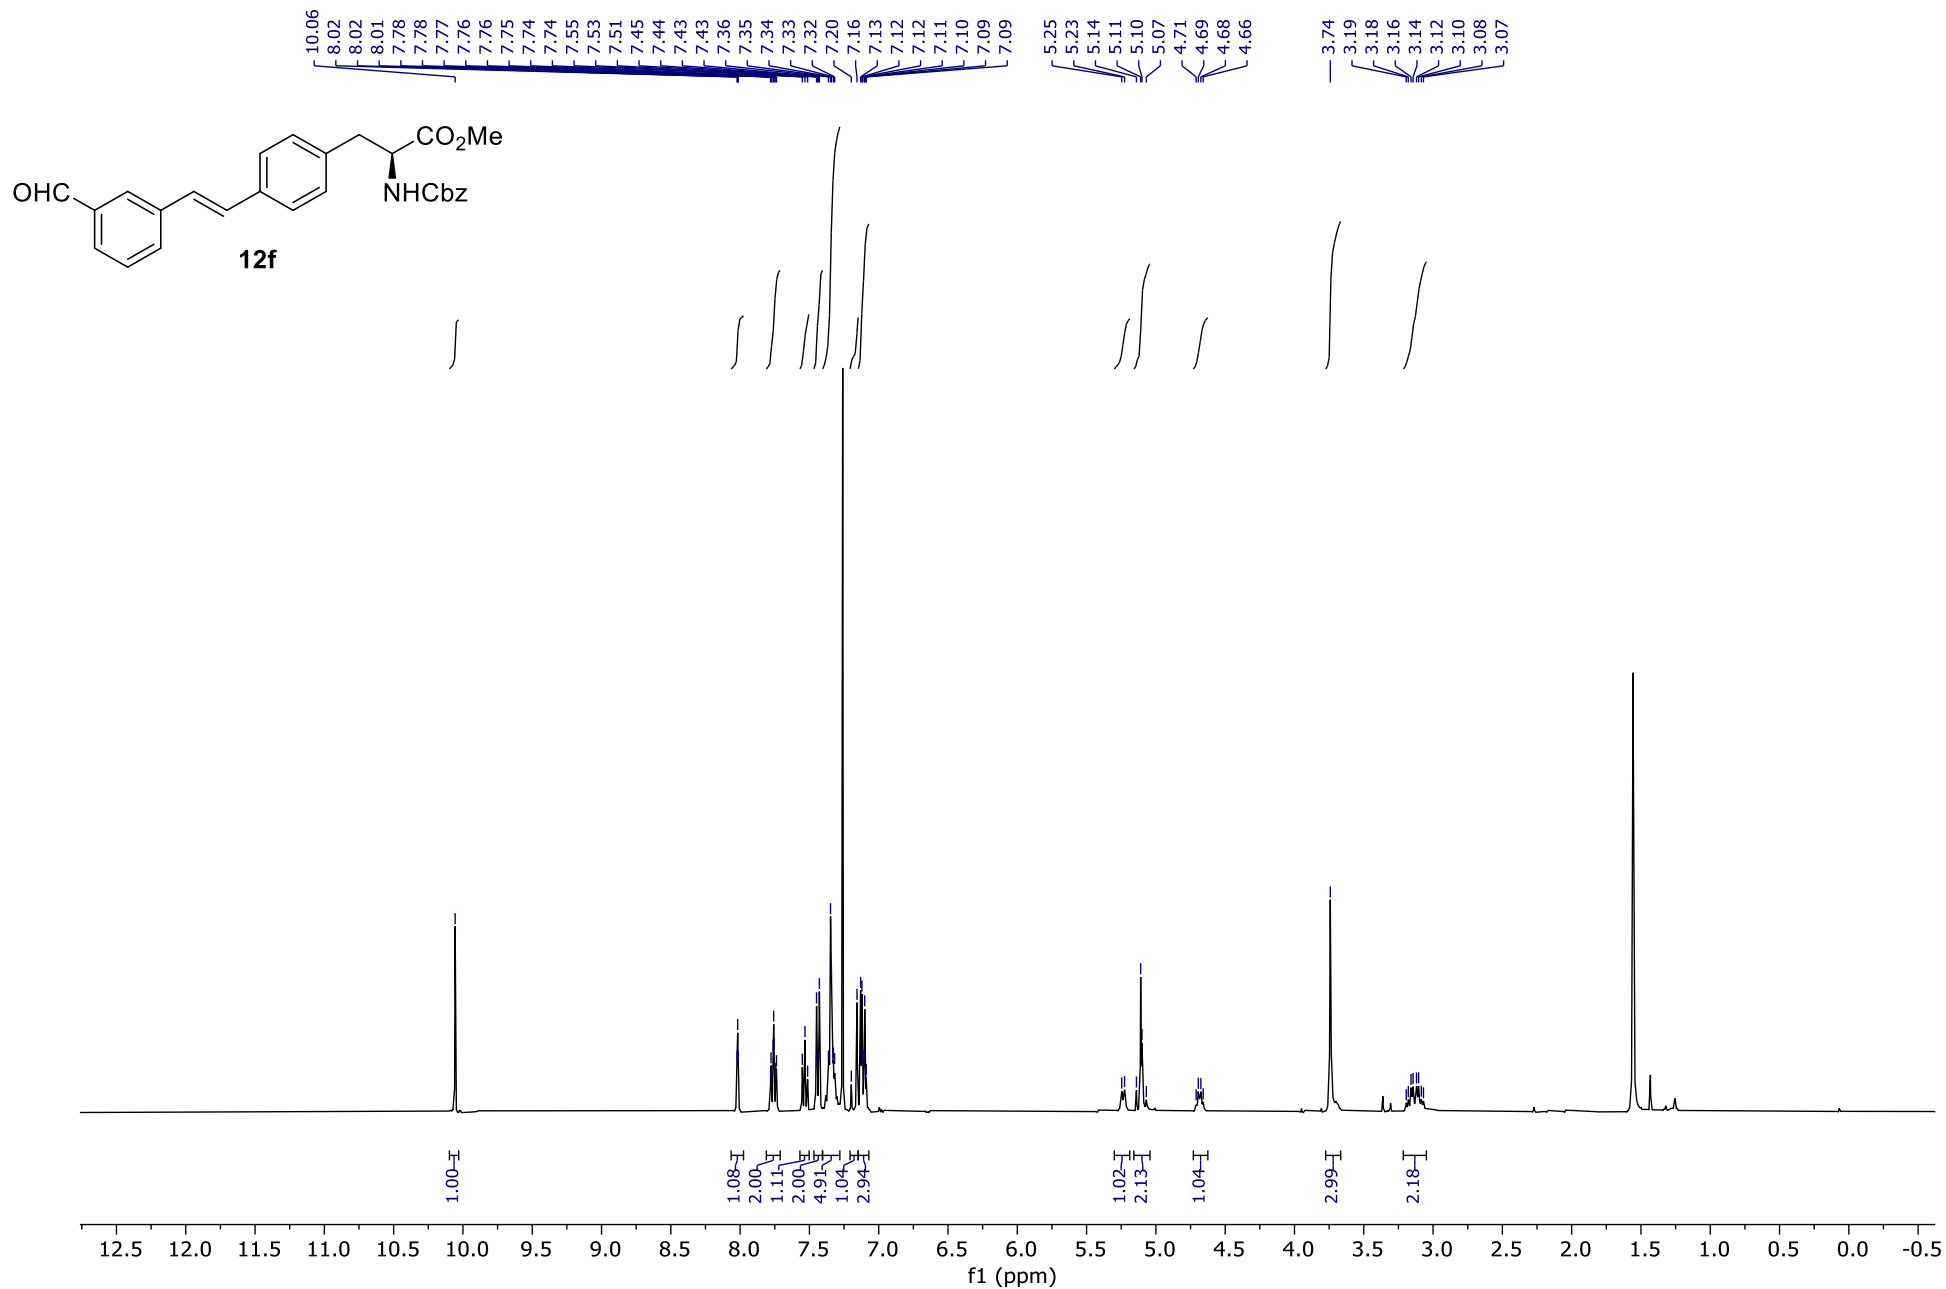

$^{13}\text{C}\{^1\text{H}\}$  NMR (101 MHz,  $\text{CDCl}_3$ )

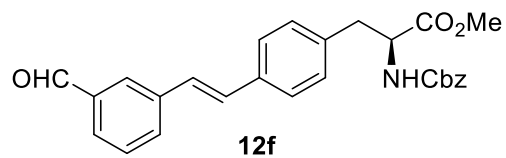

— 192.41

— 171.99

— 155.72

— 138.38

— 136.90

— 136.31

— 135.90

— 135.70

— 132.37

— 130.10

— 129.81

— 129.46

— 128.98

— 128.61

— 128.28

— 128.18

— 127.21

— 127.13

— 126.98

— 67.07

— 54.86

— 52.47

— 38.09

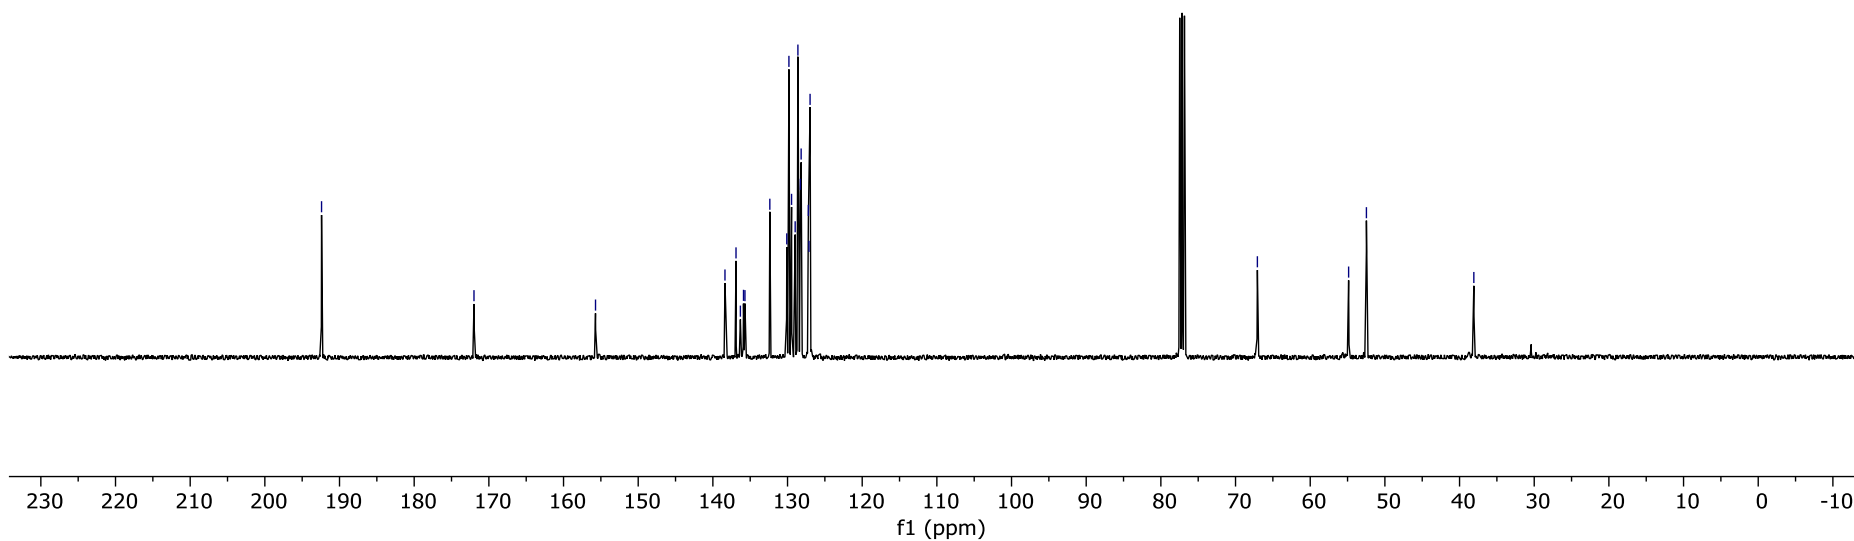



**<sup>1</sup>H NMR (400 MHz, CD<sub>3</sub>OD)**

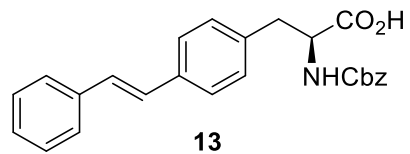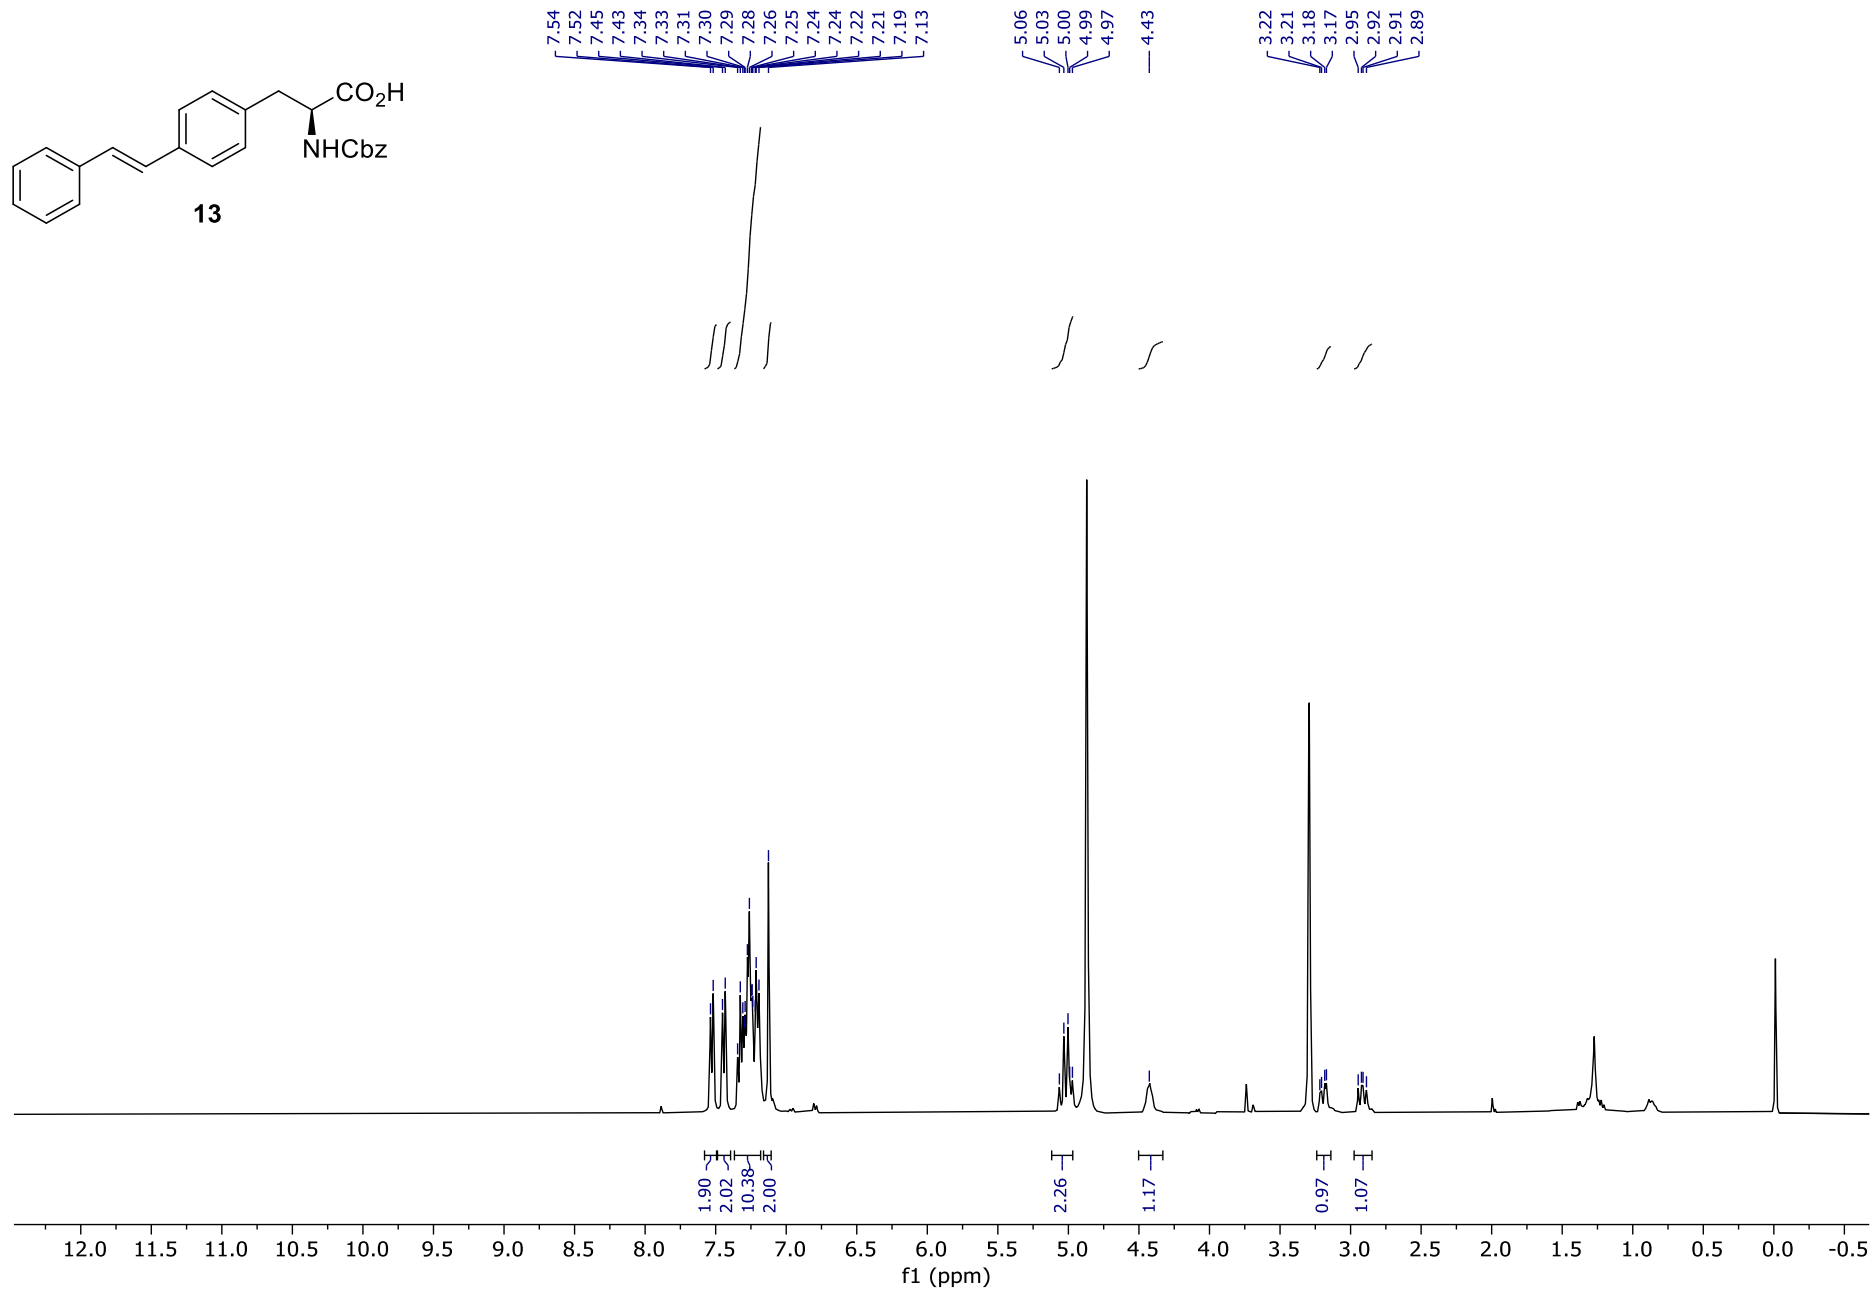

$^{13}\text{C}\{^1\text{H}\}$  NMR (101 MHz,  $\text{CD}_3\text{OD}$ )

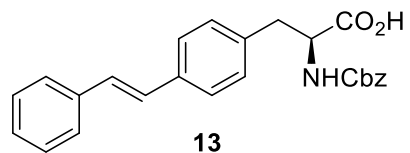

— 175.10

— 158.39

138.89  
138.24  
138.08  
137.35  
130.67  
129.69  
129.43  
129.41  
128.88  
128.64  
128.53  
127.58  
127.48

— 67.47

— 56.73

— 38.42

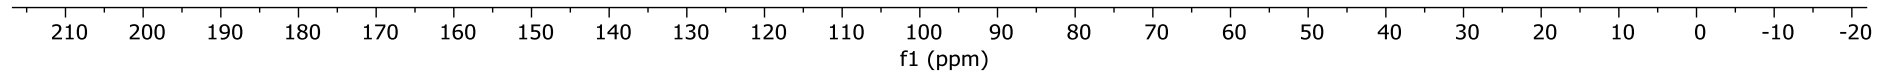

**<sup>1</sup>H NMR (400 MHz, CD<sub>3</sub>OD)**

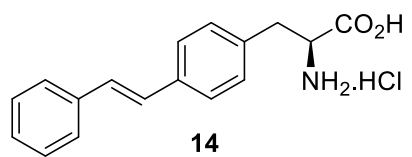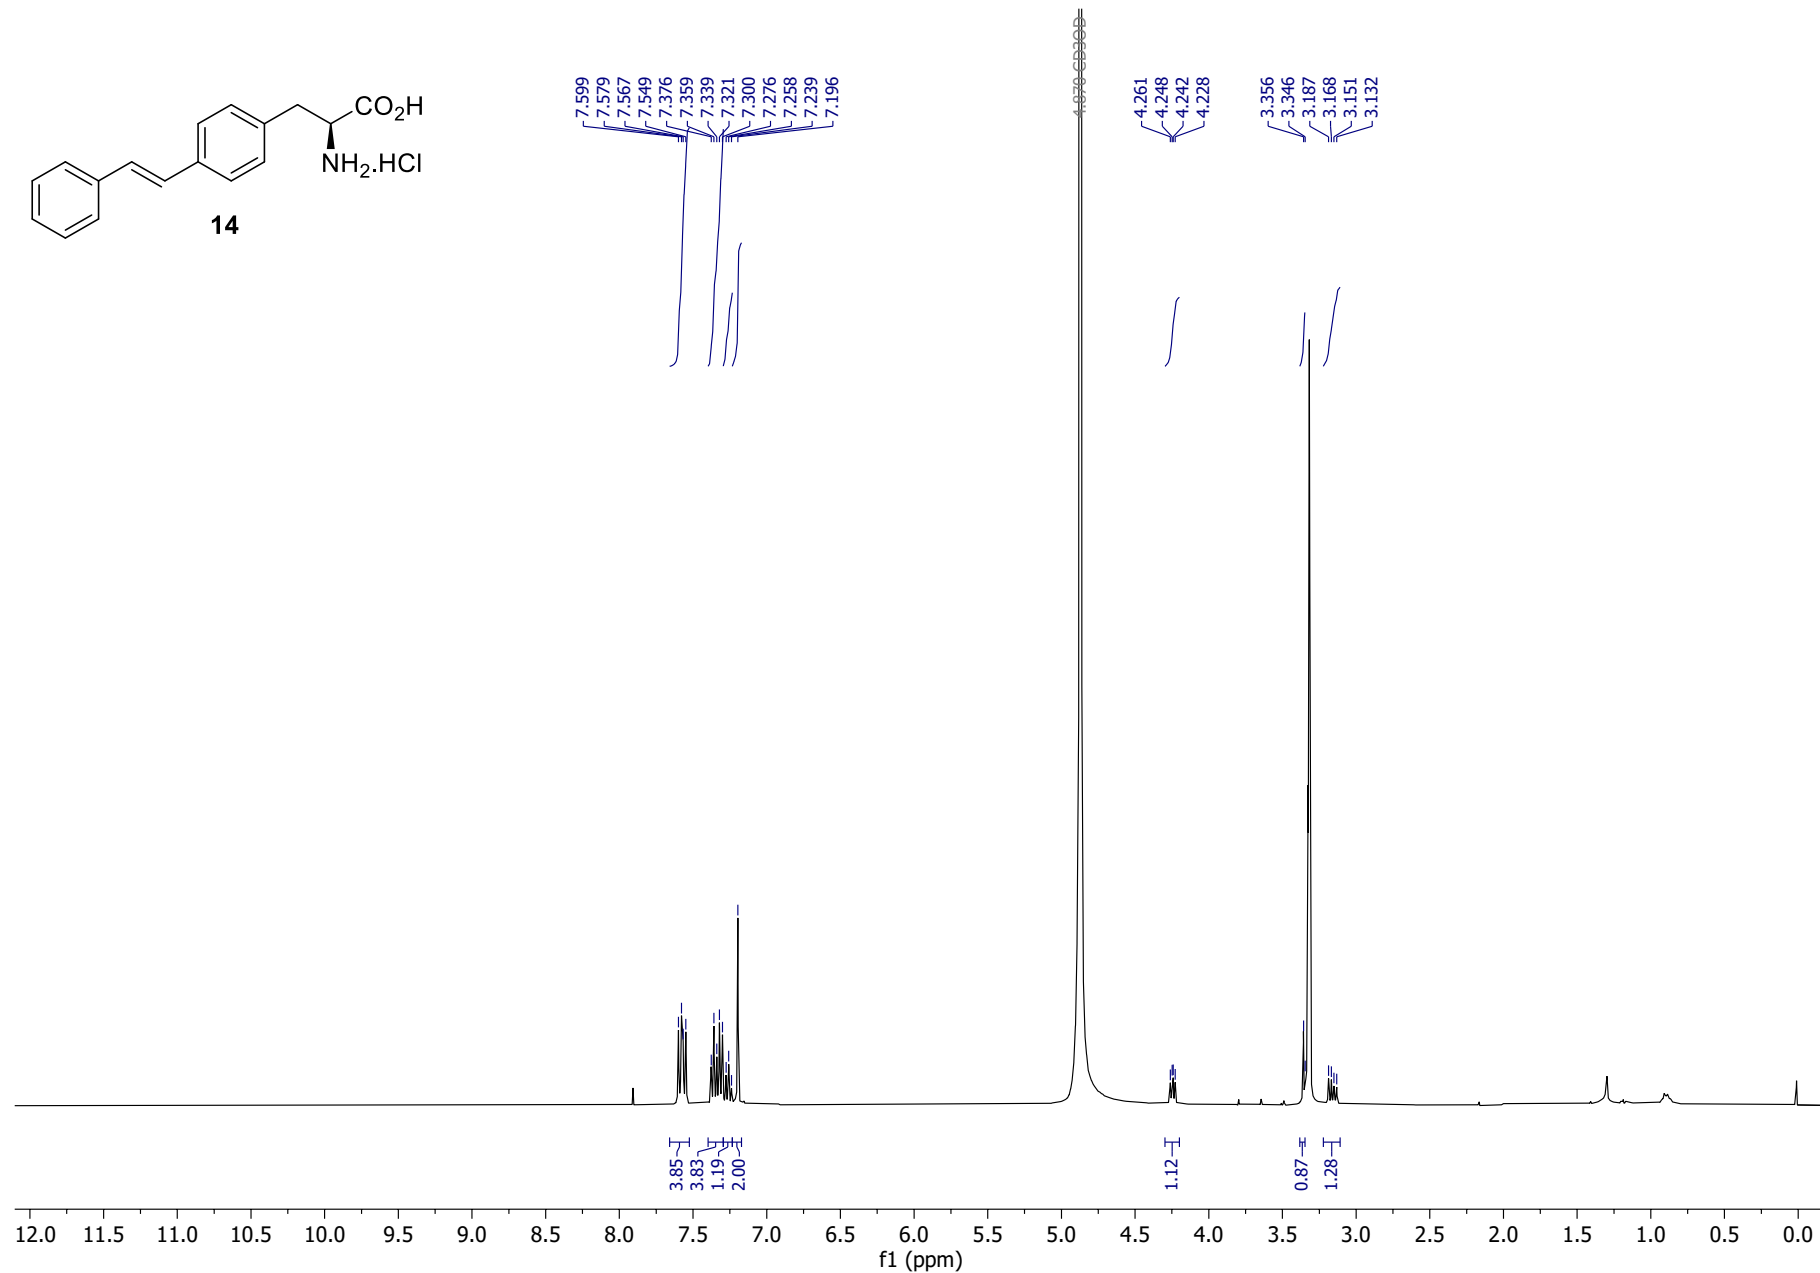

$^{13}\text{C}\{^1\text{H}\}$  NMR (101 MHz,  $\text{CD}_3\text{OD}$ )

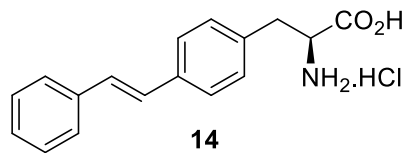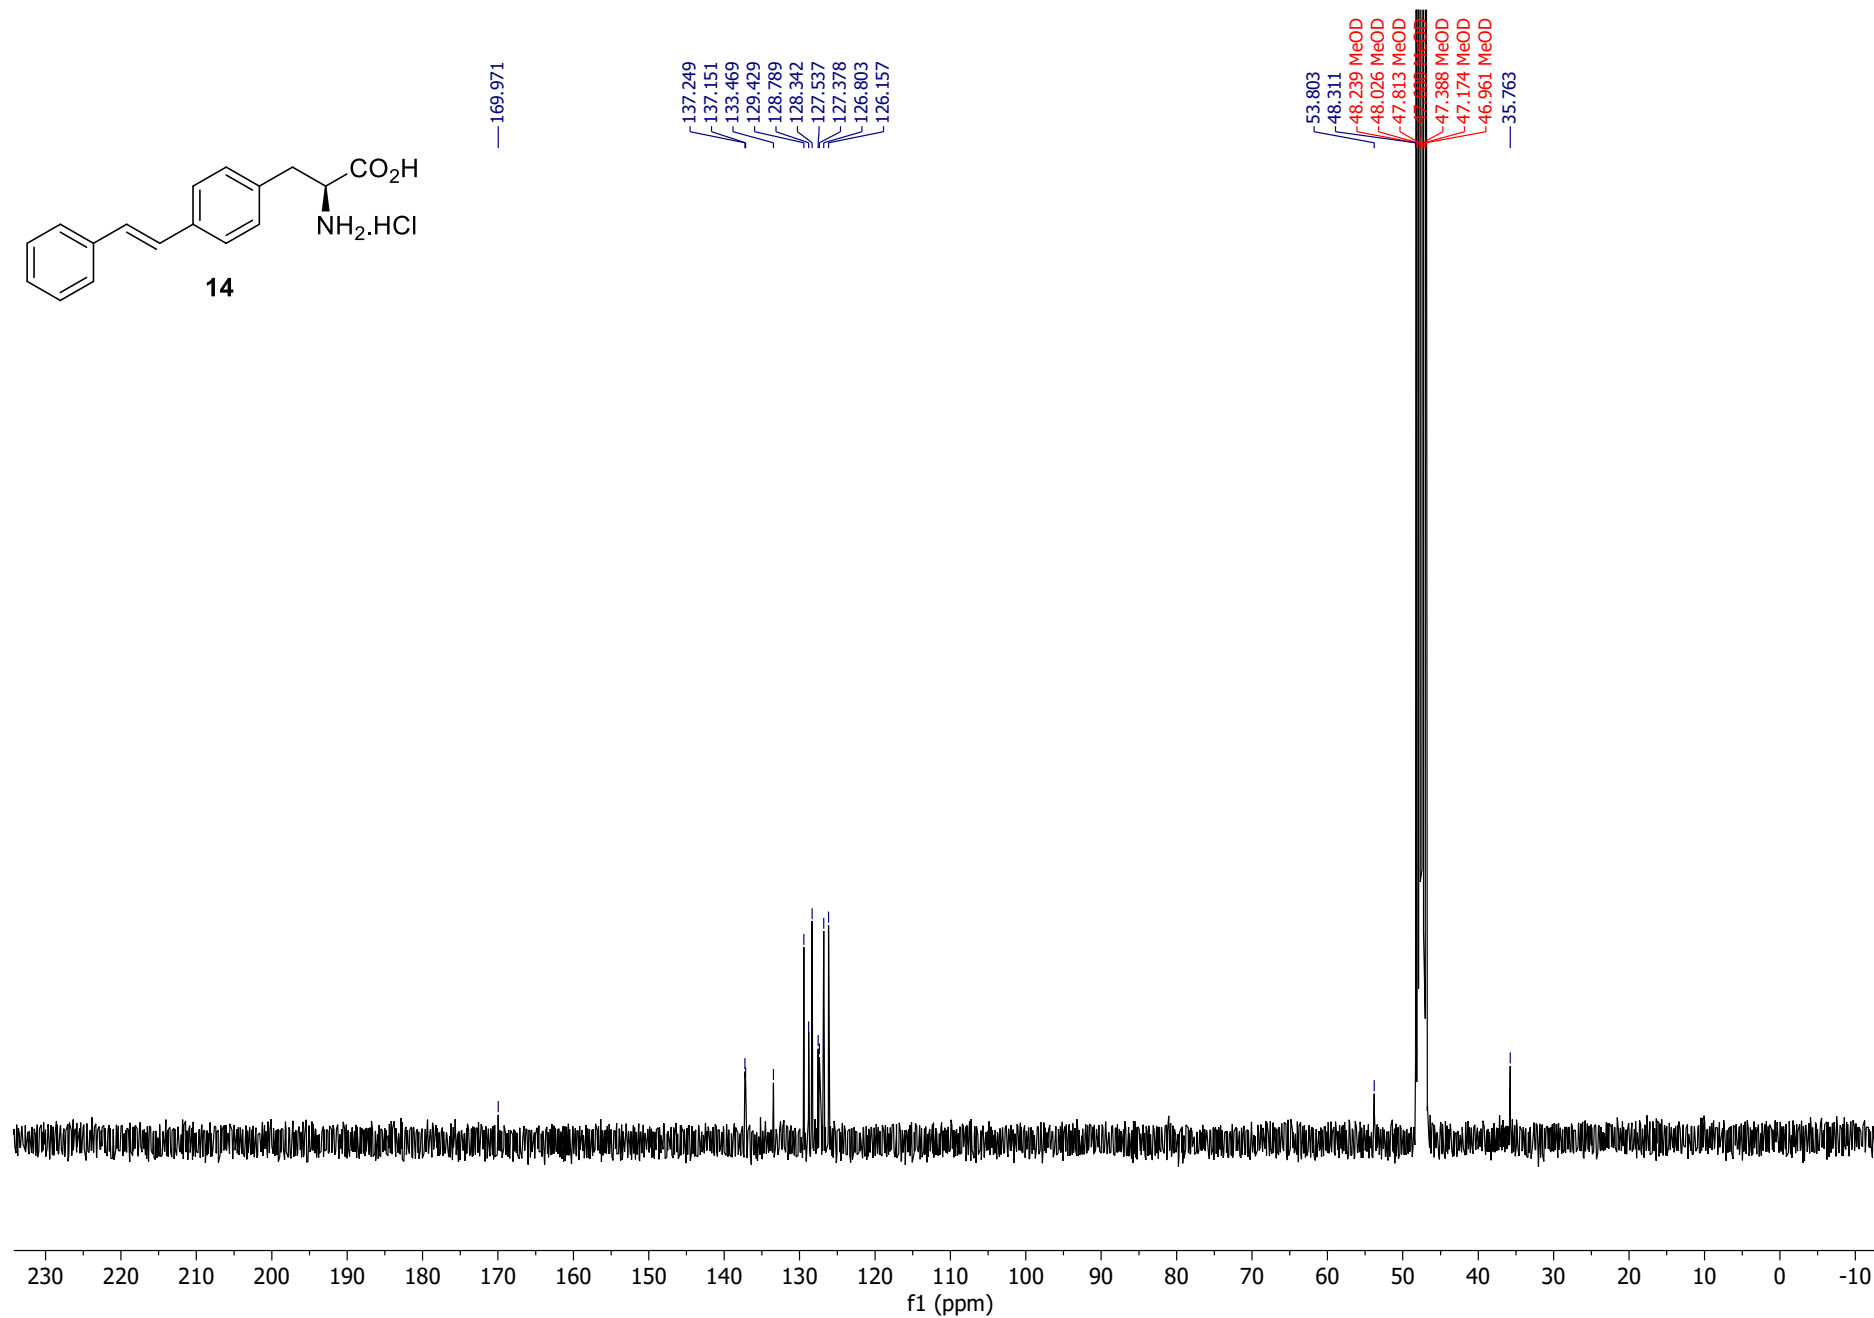

Supplement: d3ob01096a1.pdf [file d3ob01096a1.pdf]
